1 **TITLE**

2 Selfish mutations dysregulating RAS-MAPK signaling are pervasive in aged human testes

3

4 **Running title:** Selfish *de novo* mutations in human testes

5

6 **Keywords:**

7 clonal expansion; germline mutation; somatic mutation; gametes; selfish spermatogonial  
8 selection; mosaicism; paternal age effect; spermatogonial stem cells.

9

10 **Authors:**

11

12 **Geoffrey J. Maher<sup>1,2¶</sup>, Hannah K. Ralph<sup>1,2¶</sup>, Zhihao Ding<sup>1,2\*¶</sup>, Nils Koelling<sup>1,2</sup>, Hana  
13 **Mlcochova<sup>1,2</sup>, Eleni Giannoulatou<sup>1,2^</sup>, Pawan Dhimi<sup>3§</sup>, Dirk S. Paul<sup>3#</sup>, Stefan H. Stricker<sup>3%</sup>,  
14 **Stephan Beck<sup>3</sup>, Gilean McVean<sup>4</sup>, Andrew OM Wilkie<sup>1,2</sup>, Anne Goriely<sup>1,2</sup>******

15 <sup>1</sup>Clinical Genetics Group, MRC-Weatherall Institute of Molecular Medicine, University of  
16 Oxford, Oxford OX3 9DS, UK; <sup>2</sup>Nuffield Division of Clinical Laboratory Sciences, Radcliffe  
17 Department of Medicine, University of Oxford, Oxford OX3 9DS, UK; <sup>3</sup>Medical Genomics,  
18 UCL Cancer Institute, University College London, London WC1E 6BT, UK; <sup>4</sup>Big Data Institute,  
19 Li Ka Shing Centre for Health Information and Discovery, University of Oxford, Oxford, UK.

20 <sup>¶</sup>equal contribution

21

22 **Current addresses:**

23 \* Genomics plc, King Charles House, Park End Street, Oxford OX1 1JD, UK. Zhihao Ding is an  
24 employee of Genomics plc. His involvement in the conduct of this research was solely in his  
25 former capacity as a Statistical Geneticist at the University of Oxford.

26 ^ Victor Chang Cardiac Research Institute, University of New South Wales, Sydney, Australia

27 § Genomics and Genome Engineering core facility, Research department of Oncology, UCL  
28 Cancer Institute, University College London, London WC1E 6BT, UK

29 # Cardiovascular Epidemiology Unit, Department of Public Health and Primary Care,  
30 University of Cambridge, Strangeways Research Laboratory, Cambridge CB1 8RN, UK

31 %MCN Junior Research Group, Munich Center for Neurosciences, Ludwig-Maximilian-  
32 Universität, BioMedical Center, Grosshaderner Strasse 9, Planegg-Martinsried, 82152,  
33 Germany

34

35 correspondence: [anne.goriely@imm.ox.ac.uk](mailto:anne.goriely@imm.ox.ac.uk)

36

37 **ABSTRACT**

38 Mosaic mutations present in the germline have important implications for reproductive risk  
39 and disease transmission. We previously demonstrated a phenomenon occurring in the male  
40 germline, whereby specific mutations arising spontaneously in stem cells (spermatogonia)  
41 lead to clonal expansion, resulting in elevated mutation levels in sperm over time. This  
42 process, termed *selfish spermatogonial selection*, explains the high spontaneous birth  
43 prevalence and strong paternal age-effect of disorders such as achondroplasia, Apert, Noonan  
44 and Costello syndromes, with direct experimental evidence currently available for specific  
45 positions of six genes (*FGFR2*, *FGFR3*, *RET*, *PTPN11*, *HRAS* and *KRAS*). We present a discovery  
46 screen to identify novel mutations and genes showing evidence of positive selection in the  
47 male germline, by performing massively parallel simplex PCR using RainDance technology to  
48 interrogate mutational hotspots in 67 genes (51.5 kb in total) in 276 biopsies of testes from 5  
49 men (median age: 83 years). Following ultra-deep sequencing (~16,000x), development of a  
50 low-frequency variant prioritization strategy and targeted validation, we identified 61 distinct  
51 variants present at frequencies as low as 0.06%, including 54 variants not previously directly  
52 associated with selfish selection. The majority (80%) of variants identified have previously  
53 been implicated in developmental disorders and/or oncogenesis and include mutations in six  
54 newly associated genes (*BRAF*, *CBL*, *MAP2K1*, *MAP2K2*, *RAF1* and *SOS1*), all of which encode  
55 components of RAS-MAPK pathway and activate signaling. Our findings extend the link  
56 between mutations dysregulating the RAS-MAPK pathway and selfish selection, and show  
57 that the ageing male germline is a repository for such deleterious mutations.

## 58 INTRODUCTION

59 The timing, location and functional effects of spontaneous mutations determine the  
60 distribution and phenotypes of mutant cells within the body: this can have a variety of impacts  
61 on the health of an individual, and potentially, their offspring. Spontaneous mutations  
62 occurring during early post-zygotic development lead to widespread tissue mosaicism that,  
63 depending on context, may be phenotypically undetectable or cause so-called ‘somatic’  
64 disorders (Campbell et al. 2015). Such early post-zygotic mosaicism occurs commonly, with  
65 up to 22% of apparently *de novo* point mutations (DNMs) detectable in a child’s blood sample  
66 likely to have occurred after fertilization (Acuna-Hidalgo et al. 2015; Krupp et al. 2017). A  
67 corollary is that a further ~4-10% of DNMs and ~4% of copy-number variants (CNVs) present  
68 in a child can be detected at low-level in one of the parent’s somatic (usually blood or saliva)  
69 samples, and are therefore in fact inherited; as these would have occurred early during  
70 parental post-zygotic development (before the separation of the somatic and gonadal  
71 lineages), they are associated with a significant risk of recurrence (Campbell et al. 2014;  
72 Acuna-Hidalgo et al. 2015; Rahbari et al. 2016; Krupp et al. 2017). By contrast, spontaneous  
73 mutations occurring postnatally contribute to tissue-specific, low-level mosaicism, formation  
74 of benign tumors, or cancer, depending on the functional consequence(s) of the acquired  
75 mutation(s), the clonal dynamics of the tissue involved and the state of the niche (Klein et al.  
76 2010a; Vermeulen et al. 2013; Holstege et al. 2014; Swanton 2015). This latter phenomenon  
77 has been documented in apparently healthy somatic tissues that display stem cell  
78 replacement (e.g. skin, colon, small intestine and blood), where low levels (~1-10%) of clonal  
79 mutations are prevalent and their incidence and frequency increase with age (Hafner et al.  
80 2010; Laurie et al. 2012; Genovese et al. 2014; Jaiswal et al. 2014; Martincorena et al. 2015;

81 McKerrell et al. 2015; Acuna-Hidalgo et al. 2017; Coombs et al. 2017; Martincorena et al.  
82 2017; Zink et al. 2017).

83

84 Analogous to the postnatal occurrence of somatic mutations, we previously demonstrated a  
85 similar phenomenon, termed selfish spermatogonial selection, that occurs in the testes of  
86 adult men as they age. However, because the testis contains germ cells that, upon  
87 fertilization, will carry the genetic information across generations, this process has important  
88 reproductive implications, being associated with an increased prevalence of pathogenic  
89 DNMs in the next-generation. Despite the relatively low average human germline point  
90 mutation rate of  $\sim 1.2 \times 10^{-8}$  per nucleotide per generation (Kong et al. 2012; Goldmann et al.  
91 2016; Jonsson et al. 2017), specific 'selfish' DNMs in *FGFR2*, *FGFR3*, *HRAS*, *PTPN11* and *RET*  
92 are observed up to 1000-fold more frequently in offspring (Goriely and Wilkie 2012). These  
93 pathogenic mutations, which cause developmental disorders that show an extreme paternal  
94 bias in origin and an epidemiological paternal age effect (collectively referred to as PAE  
95 disorders; for example achondroplasia, Apert, Costello and Noonan syndromes, multiple  
96 endocrine neoplasia type 2a/b), are identical (or allelic) to oncogenic driver mutations in  
97 tumors (Goriely and Wilkie 2012). We proposed that although the mutational events arise at  
98 low background rates in male germ cells, selfish mutations confer a selective advantage to  
99 spermatogonia leading to their clonal expansion, which results in increased apparent  
100 mutation levels in sperm over time (Goriely and Wilkie 2012; Maher et al. 2014).

101

102 Three methods have previously been used to detect selfish mutations in the male germline,  
103 each of which has been limited in their ability to evaluate the process at scale: (1)  
104 quantification in sperm, (2) quantification in testis biopsies and (3) direct identification in

105 seminiferous tubules. Detecting selfish mutations in sperm, in which individual mutations are  
106 present at levels ranging from  $10^{-3}$  to  $<10^{-6}$ , requires ultra-sensitive techniques that have  
107 limited quantitative analysis to small regions of 1-6 nucleotides across five locations in *FGFR2*  
108 (x2) (Goriely et al. 2003; Goriely et al. 2005; Yoon et al. 2009), *FGFR3* (x2) (Tiemann-Boege et  
109 al. 2002; Goriely et al. 2009) and *HRAS* (Giannoulatou et al. 2013) (Supplementary Table 1).  
110 To circumvent the technical challenges caused by mutational dilution within an entire  
111 ejaculate, mutations may alternatively be identified following systematic dissection and  
112 sequencing of DNA extracted from discrete testicular biopsies. The germ cells (from diploid  
113 spermatogonia to haploid spermatozoa) are located in long (up to ~80 cm) highly convoluted  
114 and tightly packed seminiferous tubules, comprising ~300-500 per testis (Glass 2005). As  
115 clonally expanding mutant spermatogonia are physically restricted to the tubules in which  
116 they arise, their geographical distribution within the testis is confined to specific regions: the  
117 existence of such localized foci has been demonstrated for selfish mutations in four genes  
118 (*FGFR2*, *FGFR3*, *PTPN11*, *RET*) (Qin et al. 2007; Choi et al. 2008; Dakouane Giudicelli et al.  
119 2008; Choi et al. 2012; Shinde et al. 2013; Yoon et al. 2013; Eboreime et al. 2016). Finally,  
120 mutant clones have been directly visualized in sections of formalin-fixed paraffin embedded  
121 (FFPE) normal human testes using immunohistochemical approaches to reveal abnormal  
122 expression of spermatogonial antigens (Lim et al. 2012; Maher et al. 2016a). Microdissection  
123 of tubules exhibiting enhanced antigen staining and subsequent whole genome amplification  
124 facilitated screening of over 100 genes, identifying 9 new selfish mutations, including one in  
125 a novel gene (*KRAS*) (Supplementary Table 1). However this approach is limited both by the  
126 need to source fixed testis samples with good tissue morphology and DNA preservation, and  
127 by the high threshold required for successful immunohistochemical detection (Maher et al.  
128 2016a; Maher et al. 2016b).

129

130 Owing to the limitations outlined above, experimental evidence of clonal expansion has so far  
131 been restricted to activating mutations at 16 codons in only six genes (Supplementary Table  
132 1), all encoding members of the receptor tyrosine kinase (RTK)-RAS-MAPK signaling pathway.  
133 Here, we hypothesized that other variants dysregulating the RAS-MAPK pathway, and/or  
134 other pathways controlling spermatogonial stem cell homeostasis, may be under positive  
135 selection in the male germline (Goriely and Wilkie 2012; Goriely et al. 2013). To reduce the  
136 required assay sensitivity compared with bulk semen analysis, and hence substantially widen  
137 the extent of the genomic target that could feasibly be analyzed in a single experiment, we  
138 exploited approach (2) above. By combining systematic dissection of 276 testicular biopsies  
139 from 5 individuals with massively parallel simplex PCR and ultra-deep sequencing (~16,000x)  
140 of mutational hotspots in 67 genes, we present the most comprehensive survey of mutations  
141 clonally enriched in the human testis to date. We describe the identification of 61 distinct  
142 variants across 15 genes with variant allele frequencies (VAF) as low as 0.06%, including 51  
143 mutations and 6 novel genes with strong support for association with the process of selfish  
144 spermatogonial selection.

145

## 146 **RESULTS**

147 To perform a discovery screen and identify novel mutations and genes under selection in the  
148 male germline, we systematically biopsied human testes following the experimental design  
149 summarized in Supplementary Figure 1. A total of 276 small biopsies (~60–180 mm<sup>3</sup>) from 5  
150 men (age range 34-90 years, median 83 years) were screened by ultra-deep Illumina  
151 sequencing (~16,000x post-filtering) of a panel of candidate loci (corresponding to 66.5 kb  
152 genomic sequence across 500 amplicons, covering mutational hotspots in 71 genes; see

153 Methods for criteria used to include loci in screen), amplified using massively parallel simplex  
154 PCR (RainDance Thunderstorm). To detect low level mosaicism (~0.1-3.0%), the background  
155 at each genomic location was independently estimated for all 431 (of 500) amplicons (in 67  
156 of 71 genes) that passed quality control (Supplementary Table 2). After normalization, a  
157 statistical model was applied to call outlier non-consensus variants at each genomic position  
158 (within each amplicon): a minimum threshold of 10 variant reads and median coverage of >  
159 5,000x was implemented to reduce false positive calls. As a conservative prioritization  
160 strategy, only variants with two or more independent calls were further studied, resulting in  
161 a set of 374 variant calls located at 361 genomic locations (see Methods). Visualization and  
162 manual curation of each of these calls identified 115 higher confidence candidate variants,  
163 distributed at 105 genomic positions across 165 biopsies (Supplementary Figure 1 and  
164 Supplementary Table 3).

165

166 As calling variants at low levels (<1%) is subject to PCR artefacts and sequencing errors  
167 (Minoche et al. 2011; Hestand et al. 2016; Salk et al. 2018), we developed a tiered strategy  
168 for further variant prioritization. We reasoned that variants called independently in  
169 overlapping amplicons or in sample replicates (12 biopsies were amplified and sequenced in  
170 duplicate) were least likely to be artefactual (Tier 1 variants, Table 1). 18 of the 40 Tier 1  
171 variants (with VAF ranging from 0.10% to 2.63%) were re-screened by PCR or using single  
172 molecule molecular inversion probes (smMIPs) and ultra-deep MiSeq sequencing (~30,000x).  
173 Seventeen of the 18 (94%) variants were validated, suggesting the great majority of Tier 1  
174 variants are true positive calls (Table 1, Supplementary Table 3). Amongst the Tier 1 variants  
175 are five mutations previously associated experimentally with selfish selection: *FGFR2*  
176 c.755C>G (p.Ser252Trp – Apert syndrome), c.758C>G (p.Pro253Arg – Apert syndrome) and

177 c.870G>T (p.Trp290Cys – Pfeiffer syndrome), *KRAS* c.182A>G (p.Gln61Arg – oncogenic) and  
178 *PTPN11* c.215C>T (p.Ala72Val – oncogenic) (Table 1). This strong enrichment for canonical  
179 examples of selfish mutations (Supplementary Table 1) provided initial validation of our  
180 experimental approach and starting hypothesis.



181 **Table 1**

| Tier | Variant number | Gene   | Variant position (hg19) and predicted amino acid substitution <sup>§</sup> | VAF range (%) | Testis | Number of positive pieces | gnomAD exome frequency | COSMIC v82           | Germline disorder |
|------|----------------|--------|----------------------------------------------------------------------------|---------------|--------|---------------------------|------------------------|----------------------|-------------------|
| 1    | 1              | AKT3   | chr1:243688575 G>C (p.Ser472Ser)                                           | 0.09          | 4      | 1                         | 0.0008568              | 0 (1, 1)             | -                 |
| 1    | 2              | APC    | chr5:112175762 T>G (p.Phe1491Val)                                          | 0.47          | 4      | 1                         | 0                      | 0 (0, 1)             | -                 |
| 1    | 3              | BRAF   | chr7:140482928 G>C (p.Pro403Ala)                                           | 0.12          | 4      | 1                         | 0.00001219             | 0 (0, 1)             | -                 |
| 1    | 4              | BRAF   | chr7:140481402 C>G (p.Gly469Ala)                                           | 0.16 - 0.32   | 1;4    | 1;3                       | 4.062E-06              | 52 (52, 123)         | -                 |
| 1    | 5              | BRAF   | chr7:140449196 T>G (p.Gln628Pro)                                           | 0.19          | 1      | 1                         | 0                      | -                    | -                 |
| 1    | 6              | BRAF   | chr7:140439614 G>T (p.Gln709Lys)                                           | 0.26          | 4      | 1                         | 0                      | -                    | -                 |
| 1    | 7              | FGFR2  | chr10:123279677 G>C (p.Ser252Trp)*                                         | 0.14 - 1.55   | 1;2;4  | 2;7;14                    | 4.086E-06              | 54 (54, 57)          | Apert syndrome    |
| 1    | 8              | FGFR2  | chr10:123279674 G>C (p.Pro253Arg)*                                         | 0.06 - 0.56   | 1;4    | 4;4                       | 0                      | 9 (9, 11)            | Apert syndrome    |
| 1    | 9              | FGFR2  | chr10:123279605 A>C (p.Phe276Cys)                                          | 0.32          | 4      | 1                         | 0                      | 1 (1, 1)             | -                 |
| 1    | 10             | FGFR2  | chr10:123279566 T>G (p.Gln289Pro)                                          | 0.12          | 4      | 1                         | 0                      | -                    | Crouzon syndrome  |
| 1    | 11             | FGFR2  | chr10:123279562 C>A (p.Trp290Cys)*                                         | 0.18 - 0.69   | 1;4    | 1;2                       | 0                      | 0 (7, 7)             | Pfeiffer syndrome |
| 1    | 12             | FGFR2  | chr10:123279562 C>G (p.Trp290Cys)#                                         | 0.12 - 0.34   | 1;4    | 2;1                       | 0                      | 7 (7, 7)             | Pfeiffer syndrome |
| 1    | 13             | FGFR2  | chr10:123274803 G>C (p.Ser372Cys)                                          | 0.11 - 0.33   | 4      | 5                         | 0                      | 1 (1, 2)             | Beare Stevenson   |
| 1    | 14             | FGFR3  | chr4:1805519 C>T (p.Ser344Phe)                                             | 0.21          | 4      | 1                         | 4.065E-06              | 1 (1, 2)             | -                 |
| 1    | 15             | FGFR3  | chr4:1807371 C>A (p.Asn540Lys)                                             | 0.07 - 0.18   | 2;4    | 1;1                       | 0                      | -                    | Hypochondroplasia |
| 1    | 16             | FGFR3  | chr4:1807371 C>G (p.Asn540Lys)                                             | 0.07          | 2      | 1                         | 0                      | -                    | Hypochondroplasia |
| 1    | 17             | FGFR3  | chr4:1807488 G>A (p.Val553Met)                                             | 0.37          | 1      | 1                         | 0.0001                 | 0 (0, 1)             | -                 |
| 1    | 18             | KRAS   | chr12:25398284 C>G (p.Gly12Ala)                                            | 0.12 - 0.37   | 1;2;4  | 1;1;1                     | 0                      | 2255 (2256, 33497)   | -                 |
| 1    | 19             | KRAS   | chr12:25398284 C>T (p.Gly12Asp)                                            | 0.12 - 1.82   | 4      | 6                         | 4.094E-06              | 14126 (14128, 33497) | -                 |
| 1    | 20             | KRAS   | chr12:25380282 G>C (p.Ala59Gly)                                            | 0.29          | 4      | 1                         | 0                      | 8 (8, 41)            | -                 |
| 1    | 21             | KRAS   | chr12:25380282 G>T (p.Ala59Glu)                                            | 0.14 - 0.50   | 4      | 2                         | 0                      | 6 (6, 41)            | -                 |
| 1    | 22             | KRAS   | chr12:25380276 T>C (p.Gln61Arg)*                                           | 0.62 - 2.63   | 4      | 9                         | 0                      | 115 (116, 601)       | -                 |
| 1    | 23             | MAP2K1 | chr15:66727455 G>C (p.Lys57Asn)                                            | 0.14          | 4      | 1                         | 0                      | 1 (14, 19)           | -                 |
| 1    | 24             | PTPN11 | chr12:112888197 T>G (p.Phe71Leu)                                           | 0.48          | 4      | 1                         | 0                      | 1 (22, 22)           | Noonan syndrome   |
| 1    | 25             | PTPN11 | chr12:112888198 G>C (p.Ala72Pro)                                           | 0.28          | 2      | 1                         | 0                      | 0 (0, 137)           | Noonan syndrome   |
| 1    | 26             | PTPN11 | chr12:112888199 C>A (p.Ala72Asp)                                           | 0.13 - 0.25   | 2      | 3                         | 0                      | 11 (11, 137)         | -                 |
| 1    | 27             | PTPN11 | chr12:112888199 C>G (p.Ala72Gly)                                           | 0.11          | 1      | 1                         | 0                      | 2 (2, 137)           | Noonan syndrome   |
| 1    | 28             | PTPN11 | chr12:112888199 C>T (p.Ala72Val)*                                          | 0.88          | 2      | 1                         | 0                      | 72 (73, 137)         | -                 |
| 1    | 29             | PTPN11 | chr12:112888202 C>T (p.Thr73Ile)                                           | 0.39 - 0.59   | 2      | 2                         | 0                      | 19 (19, 19)          | Noonan syndrome   |
| 1    | 30             | PTPN11 | chr12:112888210-112888211 GA>CT (p.Glu76Leu)                               | 0.19          | 1      | 1                         | 0                      | 0 (0, 203)           | -                 |
| 1    | 31             | PTPN11 | chr12:112888211 A>C (p.Glu76Ala)                                           | 0.45 - 0.69   | 1;2    | 1;1                       | 0                      | 20 (20, 203)         | -                 |
| 1    | 32             | PTPN11 | chr12:112888211 A>T (p.Glu76Val)                                           | 0.24 - 0.93   | 2;4    | 1;1                       | 0                      | 11 (11, 203)         | -                 |
| 1    | 33             | PTPN11 | chr12:112924336 G>A (p.Val428Met)                                          | 0.54          | 4      | 1                         | 4.063E-06              | 3 (3, 3)             | -                 |
| 1    | 34             | PTPN11 | chr12:112924336 G>T (p.Val428Leu)                                          | 0.52          | 4      | 1                         | 0                      | 0 (0, 3)             | -                 |
| 1    | 35             | PTPN11 | chr12:112926908 C>A (p.Gln510Lys)                                          | 0.13 - 0.30   | 4      | 2                         | 0                      | 3 (3, 21)            | -                 |
| 1    | 36             | RET    | chr10:43613906 G>C (p.Leu790Phe)                                           | 0.15          | 4      | 1                         | 4.063E-06              | 0 (0, 1)             | MEN2A             |
| 1    | 37             | RET    | chr10:43613906 G>T (p.Leu790Phe)                                           | 0.10 - 0.42   | 4      | 3                         | 0.00002032             | 0 (0, 1)             | MEN2A             |
| 1    | 38             | RET    | chr10:43615613 G>T (p.Asp898Tyr)                                           | 0.15          | 2      | 1                         | 4.072E-06              | 0 (0, 1)             | MEN2              |
| 1    | 39             | SOS1   | chr2:39250292 T>G (p.Gln426Pro)                                            | 0.37          | 4      | 1                         | 0                      | 0 (0, 1)             | -                 |
| 2    | 40             | BRAF   | chr7:140453155 C>G (p.Asp594His)                                           | 0.06 - 0.23   | 2      | 2                         | 0                      | 3 (3, 126)           | -                 |
| 2    | 41             | BRAF   | chr7:140453132 T>G (p.Lys601Asn)                                           | 0.22 - 0.42   | 4      | 2                         | 0                      | 7 (18, 129)          | -                 |
| 2    | 42             | CBL    | chr11:119148991 G>A (p.Cys404Tyr)                                          | 0.52 - 0.63   | 5      | 2                         | 8.126E-06              | 15 (15, 19)          | -                 |
| 2    | 43             | FGFR2  | chr10:123276865 G>C (p.Ser351Cys)                                          | 0.09 - 0.26   | 4      | 4                         | 0                      | 0 (0, 1)             | Pfeiffer syndrome |
| 2    | 44             | FGFR2  | chr10:123276893 A>T (p.Cys342Ser)^                                         | 0.26 - 2.95   | 1      | 7                         | 0                      | -                    | Crouzon syndrome  |
| 2    | 45             | FGFR2  | chr10:123258034 A>C (p.Asn549Lys)                                          | 0.14 - 0.34   | 4      | 2                         | 0                      | 10 (34, 44)          | -                 |
| 2    | 46             | FGFR3  | chr4:1808029 C>G (p.Arg669Gly)                                             | 0.14 - 0.24   | 1      | 2                         | 4.105E-06              | 0 (0, 1)             | -                 |
| 2    | 47             | LRP5   | chr11:68115514 C>T (p.Ala97Ala)                                            | 0.53 - 1.20   | 4      | 4                         | 0.0004877              | -                    | -                 |
| 2    | 48             | MAP2K2 | chr19:4110584 A>T (p.Cys125Ser)                                            | 0.14 - 0.21   | 2      | 2                         | 0                      | 1 (3, 5)             | -                 |
| 2    | 49             | NF1    | chr17:29554264 G>A (p.Met760Ile)                                           | 0.87 - 2.07   | 4      | 9                         | 0                      | -                    | -                 |
| 2    | 50             | PTPN11 | chr12:112888166 A>C (p.Asp61Ala)                                           | 0.26 - 1.02   | 2      | 2                         | 0                      | 1 (1, 121)           | Noonan syndrome   |
| 2    | 51             | PTPN11 | chr12:112888166 A>G (p.Asp61Gly)                                           | 0.71 - 0.73   | 4      | 2                         | 0                      | 6 (6, 121)           | Noonan syndrome   |
| 2    | 52             | PTPN11 | chr12:112891083 G>T (p.Glu139Asp)                                          | 0.15 - 0.56   | 4      | 2                         | 0                      | 1 (5, 6)             | Noonan syndrome   |
| 2    | 53             | PTPN11 | chr12:112915455 T>G (p.Phe285Cys)                                          | 0.09 - 0.24   | 2      | 2                         | 0                      | -                    | Noonan syndrome   |
| 2    | 54             | PTPN11 | chr12:112915523 A>G (Asn308Asp)*                                           | 0.68 - 0.69   | 4      | 2                         | 1.219E-5               | 4 (4, 7)             | Noonan syndrome   |
| 2    | 55             | PTPN11 | chr12:112926884-112926885TC>AA (p.Ser502Lys)                               | 0.25          | 4      | 1                         | 0                      | 0 (0, 44)            | -                 |
| 2    | 56             | PTPN11 | chr12:112926890 A>G (p.Met504Val)                                          | 0.67 - 0.82   | 4      | 2                         | 4.061E-06              | 1 (1, 1)             | Noonan syndrome   |
| 2    | 57             | RAF1   | chr3:12645699 G>A (p.Ser257Leu)                                            | 0.44 - 0.56   | 4      | 2                         | 0                      | 14 (14, 15)          | Noonan syndrome   |
| 3    | 58             | BRAF   | chr7:140453096 C>G (p.Leu613Phe)                                           | 0.10          | 4      | 1                         | 0                      | -                    | -                 |
| 3    | 59             | MAP2K1 | chr15:66727451 A>C (p.Gln56Pro)                                            | 0.07 - 0.11   | 4      | 3                         | 0                      | 8 (8, 8)             | -                 |
| 3    | 60             | PTPN11 | chr12:112888162 G>C (p.Gly60Arg)                                           | 0.09 - 0.17   | 1      | 2                         | 0                      | 6 (6, 55)            | -                 |
| 3    | 61             | RAF1   | chr3:12645688 G>C (p.Pro261Ala)                                            | 0.15          | 4      | 1                         | 0                      | 0 (0, 8)             | Noonan syndrome   |

**Table 1. List of 61 validated variants identified in this study.**

<sup>§</sup> for amino acid numbering see transcript accession code details. \* Variant previously associated with selfish selection. # Distinct DNA substitution but same amino acid substitution as previously described. ^ Same clone as previously described (Lim et al. 2012; Maher et al. 2016a). For variants covered by more than one amplicon or called in sample replicates, variant allele frequencies (VAF) are the averages of calls per piece. Variant frequencies in gnomAD exome dataset were accessed September 2017. Counts from the COSMIC database (v82) refer to identical DNA substitutions, identical amino acid substitutions and total substitutions at the specific amino acid, respectively.

182  
183  
184  
185  
186  
187  
188  
189  
190

191 Within the panel, the majority (88.7%) of callable (i.e. excluding primer sequences and  
192 amplicons with low QC) regions were represented by a single amplicon and only 12 biopsies  
193 were sequenced in duplicate (Supplementary Table 4): hence, we next investigated variants  
194 that were called in single amplicons in two or more biopsies, at VAF of  $\geq 0.2\%$  in at least one  
195 biopsy (Tier 2). Twenty-six Tier 2 variants were identified, 18 (69%) of which were validated  
196 upon resequencing (Table 1, Supplementary Table 3). Notably, all (14/14) of the known  
197 pathogenic variants were validated, but only four of the twelve variants without prior disease  
198 association were true positives. In biopsy 4D25, *PTPN11* c.1504T>A (p.Ser502Thr - Noonan  
199 syndrome) was called as a single nucleotide variant but on validation it was identified as a  
200 double nucleotide substitution c.1504\_1505delTCinsAA (p.Ser502Lys). Next, 29 variants with  
201 a VAF of 0.1 -  $< 0.2\%$  called in a single amplicon in two or more biopsies (Tier 3) were identified.  
202 Only 4 of the 22 (18%) resequenced Tier 3 variants were validated, suggesting that in this  
203 lower frequency range, the majority of calls are artefactual (Table 1, Supplementary Table 3).  
204 Owing to the low validation rate of variants with VAFs of 0.1 -  $< 0.2\%$ , none of the remaining  
205 20 calls that exhibited VAF  $< 0.1\%$  (Tier 4) variants were re-screened for validation  
206 (Supplementary Table 3).

207

208 Overall we identified 61 distinct variants that we classified as independently validated,  
209 present in 15 of the 67 genes that passed quality control and were analyzed in the experiment.  
210 Based on the identification of the same variant in testes sourced from different men, we  
211 conclude that at least 72 independent mutational events (clones) could be distinguished  
212 across the five testes (Table 1, Figure 1, Supplementary Figs 2-3). Two variants (*FGFR2*  
213 c.755C>G (p.Ser252Trp) (#7) and *KRAS* c.35G>C (p.Gly12Ala) (#19)) occurred in three testes  
214 and seven in two testes (Figure 1; Supplementary Fig 2). Strikingly, these variants are all either

215 recurrent mutations causative of congenital skeletal disorders, or known hotspots in cancer  
216 (COSMIC) that may be associated with lethal or as yet undescribed congenital disorders (Table  
217 1). Figure 2 details all validated variants for the two genes most highly represented in this list,  
218 *FGFR2* and *PTPN11* (15 independent mutational events responsible for 10 distinct variants in  
219 *FGFR2* (encoding nine pathogenic protein changes); and 22 independent mutational events  
220 of 20 distinct variants in *PTPN11*). Their relative locations on the respective protein products  
221 shows striking overlap with mutational hotspots previously associated with developmental  
222 disorders and cancer. The corollary is that our observations of these mutations in testes are  
223 likely to be relevant to the biological origins of the cognate diseases. Similar plots for 13 other  
224 genes with validated variants are presented in Supplementary Figure 3.

225

226

227 **Figure 1. Distribution of validated variants in testis slices 1D, 2F, 4B, and 5J.** Testicular biopsy numbers are  
228 located to the left of each testis slice. Some biopsies were further dissected into two pieces of which the  
229 orientation is unknown – these are indicated with a diagonal dashed line (e.g. Tes2F 30a,b). Each variant has a  
230 distinct number (as listed in Table 1) and is colored according to gene: *FGFR2* (purple), *FGFR3* (orange), *KRAS*  
231 (black), *PTPN11* (blue), *RET* (pink), newly associated gene (red). The size of each circle is proportional to the  
232 observed variant allele frequency (VAF) in each biopsy as indicated by black dots on the figure key. Identical  
233 variants in different biopsies have been connected by lines that likely track the seminiferous trajectory across  
234 the testis and therefore may represent a single ‘clonal event’; note that the path of the clone has been arbitrarily  
235 drawn and may not represent the true geography of a seminiferous tubule across the testis. Dark gray segments  
236 represent biopsies that were not sequenced due to insufficient material quality/quantity (see Methods). Light  
237 gray segments represent non-tubular regions of tissue. The age of the individual from whom the sample was  
238 collected is indicated on the figure (See Supplementary Table 5 for further details on the testicular samples). The  
239 remaining five slices of Tes4 are presented in Supplementary Figure 2. Tes3D is omitted as no variants were  
240 identified

241

**Testis 1D  
(71 years)**

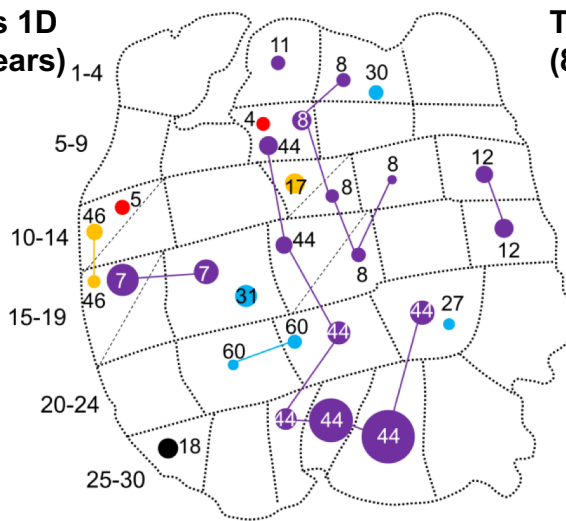

**Testis 2F  
(83 years)**

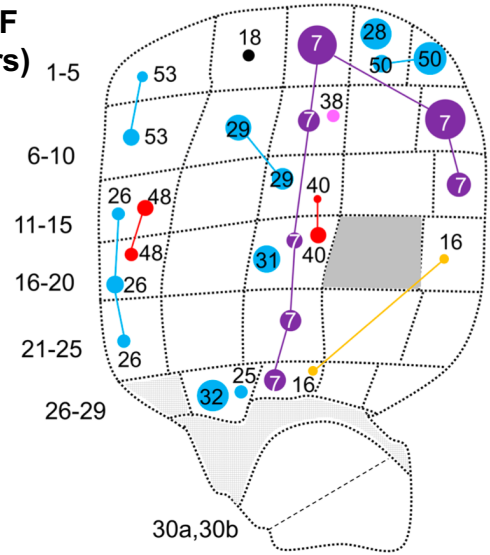

**Testis 4B  
(90 years)**

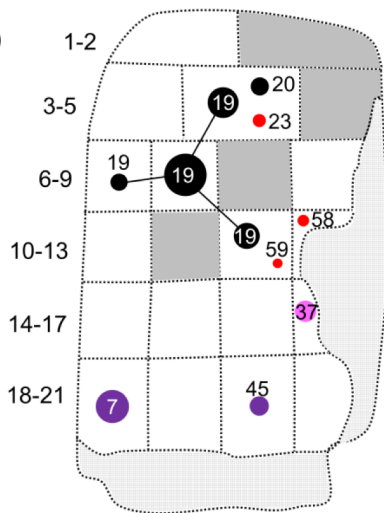

**Testis 5J  
(34 years)**

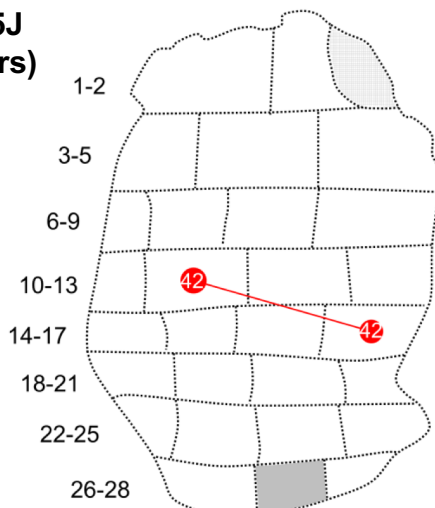

- 7 ● *FGFR2* c.755C>G (p.Ser252Trp)
- 8 ● *FGFR2* c.758C>G (p.Pro253Arg)
- 11 ● *FGFR2* c.870G>T (p.Trp290Cys)
- 12 ● *FGFR2* c.870G>C (p.Trp290Cys)
- 44 ● *FGFR2* c.1024T>A (p.Cys342Ser)
- 45 ● *FGFR2* c.1647T>G (p.Asn549Lys)
- 16 ● *FGFR3* c.1620C>G (p.Asn540Lys)
- 17 ● *FGFR3* c.1657G>A (p.Val553Met)
- 46 ● *FGFR3* c.2005C>G (p.Arg669Gly)
- 18 ● *KRAS* c.35G>C (p.Gly12Ala)
- 19 ● *KRAS* c.35G>A (p.Gly12Asp)
- 20 ● *KRAS* c.176C>G (p.Ala59Gly)
- 25 ● *PTPN11* c.214G>C (p.Ala72Pro)
- 26 ● *PTPN11* c.215C>A (p.Ala72Asp)
- 27 ● *PTPN11* c.215C>G (p.Ala72Gly)
- 28 ● *PTPN11* c.215C>T (p.Ala72Val)
- 29 ● *PTPN11* c.218C>T (p.Thr73Ile)
- 30 ● *PTPN11* c.226C\_227delGAinsCT (p.Glu76Leu)
- 31 ● *PTPN11* c.227A>C (p.Glu76Ala)
- 32 ● *PTPN11* c.227A>T (p.Glu76Val)
- 50 ● *PTPN11* c.182a>C (p.Asp61Ala)
- 53 ● *PTPN11* c.854T>G (p.Phe285Cys)
- 60 ● *PTPN11* c.178G>C (p.Gly60Arg)
- 37 ● *RET* c.2370G>T (p.Leu790Phe)
- 38 ● *RET* c.2692G>T (p.Asp898Tyr)
- 4 ● *BRAF* c.1406G>C (p.Gly469Ala)
- 5 ● *BRAF* c.1883A>C (p.Gln628Pro)
- 23 ● *MAP2K1* c.171G>C (p.Lys57Asn)
- 40 ● *BRAF* c.1780G>C (p.Asp594His)
- 42 ● *CBL* c.1211G>A (p.Cys404Tyr)
- 48 ● *MAP2K2* c.373T>A (p.Cys125Ser)
- 58 ● *BRAF* c.1839G>C (p.Leu613Phe)
- 59 ● *MAP2K1* c.167A>C (p.Gln56Pro)

- 1.0%
- 0.5%
- 0.1%

242 **Figure 1**

243

244 **Figure 2. Spontaneous mutations in *FGFR2* (A) and *PTPN11* (encoding SHP2) (B) identified in testicular biopsies**

245 (A) (I) Ten validated variants positioned along the amino acid sequence of *FGFR2* (*x*-axis, see panel V), ranging in

246 VAF from 0.06% to 2.95% (*y*-axis), identified in Tes1D, Tes2F and Tes4. Numbers correspond to those in Table 1;

247 two different variants (c.870G>C or T) predicted to cause the same p.Trp290Cys substitution (#11, #12) were

248 identified. (II) Relative location and length of amplicons used to sequence main hotspots of *FGFR2* are plotted

249 on the *x*-axis. Median coverage per amplicon is plotted on the *y*-axis. All amplicons had median coverage above

250 the cut-off (red dashed line) of 5,000x. (III) Number of reported constitutional variants encoding amino acid

251 substitutions in *FGFR2* associated with developmental disorders (sqrt scale) (updated from (Wilkie 2005)). (IV)

252 Number of reported somatic amino acid substitutions in *FGFR2* in cancer (COSMIC v82). (v) Protein domains of

253 *FGFR2*. Annotations and protein structure are based on transcript ID NM\_000141 and Uniprot ID P21802

254 (v2017\_01), respectively.

255 (B) (I) Twenty validated variants positioned along the amino acid sequence of SHP2 (*x*-axis, see panel (V)), ranging

256 in VAF from 0.09% to 1.02% (*y*-axis), identified in Tes1D, Tes2F and Tes4. (II) Location and size of amplicons used

257 to sequence main hotspots of *PTPN11* are plotted on the *x*-axis. Median coverage per amplicon is plotted on the

258 *y*-axis. All amplicons except one had median coverage above the cut-off of 5,000x. (III) Number of reported

259 constitutional variants encoding amino acid substitutions in SHP2 associated with developmental disorders (sqrt

260 scale). (IV) Number of reported somatic amino acid substitutions in SHP2 in cancer (COSMIC v82). (V) Protein

261 domains of SHP2. Annotations and protein structure are based on transcript ID NM\_002834 and Uniprot ID

262 Q06124 (v2017\_01), respectively.

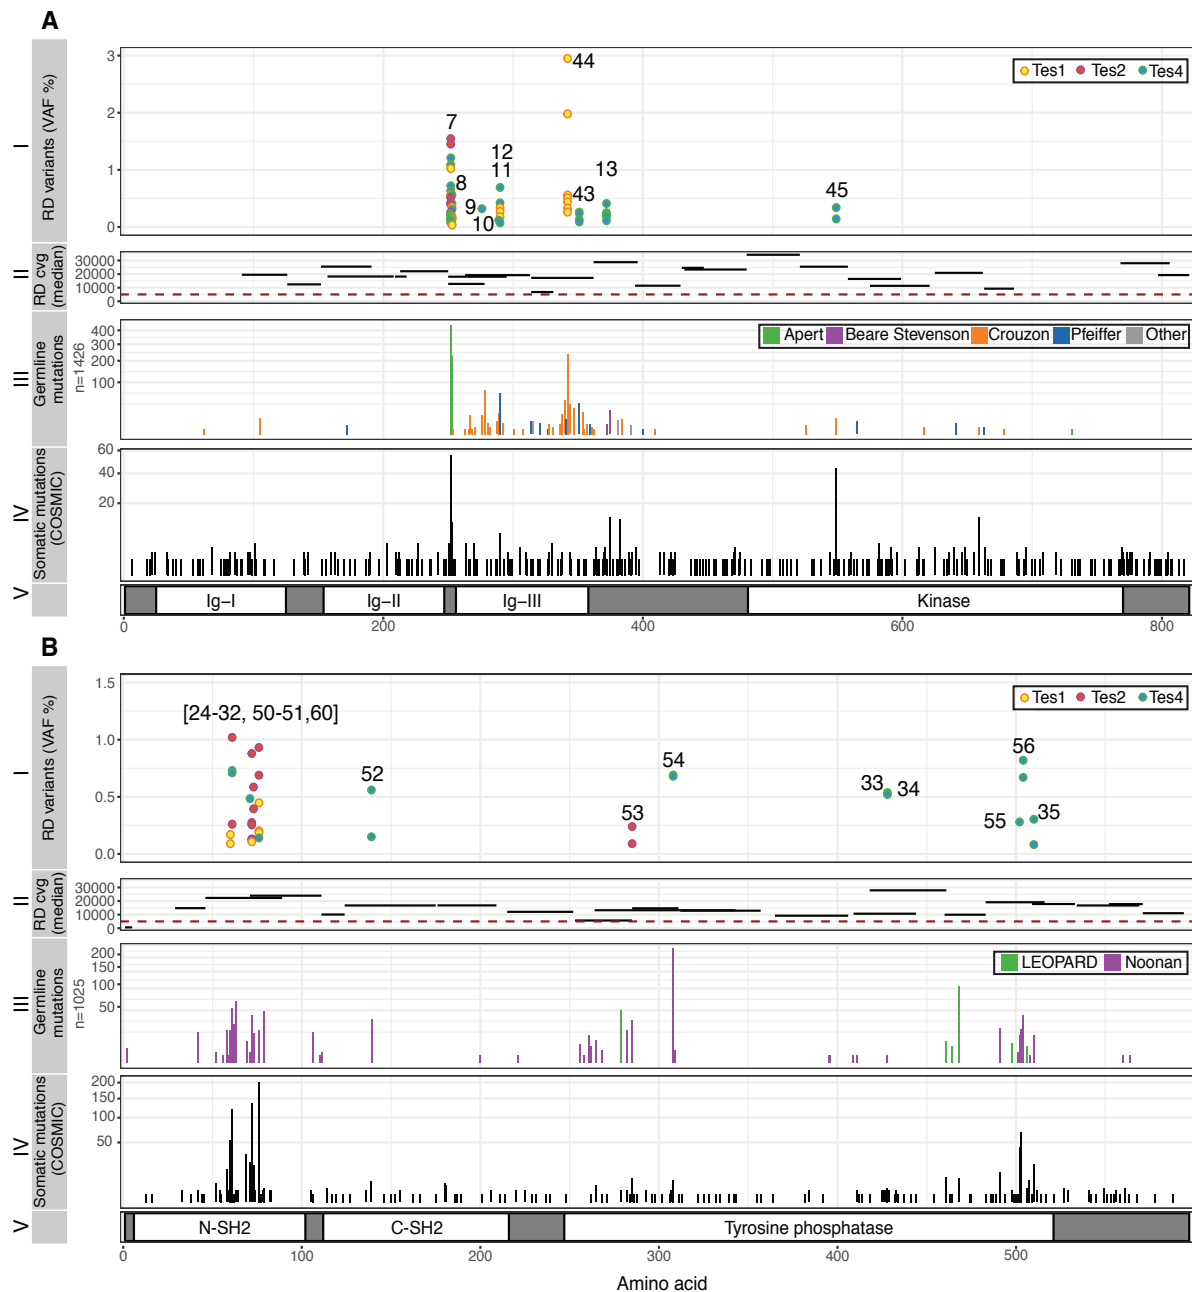

263

264

265

## Figure 2

266

Next, using the geographical register of the multiple biopsies, the spatial distribution of each

267

variant across the testicular biopsies was investigated (Figure 1, Supplementary Figure 2). For

268

example, in 6 of 153 biopsies across three slices from Tes4 we identified a *KRAS* c.35G>A

269

(p.Gly12Asp) mutation (#18). *KRAS* c.35G>A is one of the most frequently reported

270

substitutions in cancer (>14,000 records in COSMIC v82) and post-zygotic *KRAS* c.35G>A

271

mutations have been reported to cause arteriovenous malformations of the brain (Nikolaev

272 et al. 2018) and linear nevus sebaceous syndrome (Wang et al. 2015), but it has never been  
273 reported as a constitutional mutation. In slice 4B (slice B of Testis 4) (Figure 1 and  
274 Supplementary Figure 3), this *KRAS* mutation was detected at VAF ranging from 0.26% to  
275 1.82% in four adjacent biopsies, suggestive of an expansion of a mutational event tracking  
276 along the length of a single seminiferous tubule. The same *KRAS* variant was also detected in  
277 two neighboring biopsies from slices 4D and 4E, apparently at a distance from the larger clone  
278 in slice 4B (Supplementary Figure 2); this smaller clone may represent a distinct mutational  
279 event having occurred in an independent tubule, but the resolving power of the experiment  
280 does not exclude the possibility that this is a large clonal event spreading along the length of  
281 a single seminiferous tubule (that measure up to ~80 cm in humans).

282

283 Owing to the convoluted packing of the seminiferous tubules, individual testicular biopsies  
284 contain segments of multiple individual tubules and in 43 biopsies more than one variant was  
285 identified (Figure 1, Supplementary Figure 2 and Supplementary Table 3). Mutations with  
286 similar distributions across multiple biopsies may represent clones either within the same  
287 tubule, or in distinct intermingled tubules running alongside each other. For example, two  
288 distinct mutations, *MAP2K2* c.373T>A (p.Cys125Ser) (oncogenic) and *PTPN11* c.215C>A  
289 (p.Ala72Asp) (oncogenic)] are both found in the adjacent biopsies 2F11 and 2F16 (Figure 1),  
290 with the latter mutation extending into the neighboring biopsy 2F21. In Tes4, four of the six  
291 biopsies positive for the oncogenic *KRAS* c.182A>G (p.Gln61Arg) mutation (4E18, 4E25, 4F27,  
292 4G1) were also positive for a synonymous variant in *LRP5* [c.291C>T (p.Ala97Ala); no prior  
293 disease association] (Supplementary Figures 2 and 4).

294

295 In contrast to selfish mutations that arise in adult spermatogonia and are therefore restricted  
296 to the seminiferous tubules in which they arise, 'classical' post-zygotic mosaic mutations  
297 occurring in embryonic primordial germ cells, before the formation of the seminiferous  
298 tubules, are expected to have a wider distribution in one or both testes. We found one  
299 suggestive example of this, an *NF1* c.2280G>A (p.Met760Ile) variant, which exhibited a  
300 pattern of occurrence in Tes4 distinct from all the other identified mutations. The variant was  
301 originally called in nine biopsies at relatively high VAF (median 1.1%, range 0.9-2.1%)  
302 (Supplementary Figure 2), and inspection of the mutation frequency in each sample  
303 (Supplementary Figure 5) showed numerous other biopsies in Tes4 with elevated VAFs,  
304 compatible with an earlier post-zygotic mosaic event. Unfortunately, no other tissue was  
305 available from this individual to test whether the variant was restricted to a single testis  
306 and/or to the germline tissue.

307

308

309 To explore the relationship between mutational events identified using RainDance technology  
310 (which inherently involves destruction of the tissue structure of the testis) and the occurrence  
311 of mutations in individual seminiferous tubules, we exploited the availability of adjacent FFPE  
312 material for two of the testes. In Tes1D, our deep-screening strategy identified a *FGFR2*  
313 c.1024T>A (p.Cys342Ser) variant at VAFs ranging from 0.26% to 2.95% in seven contiguous  
314 biopsies, suggestive of a clonal event tracking a single seminiferous tubule across the testis  
315 (Figures 1 and 2, variant #44). For this testis, we had previously studied the adjacent FFPE  
316 tissue block (Tes1-1 described in (Lim et al. 2012; Maher et al. 2016a)) using  
317 immunohistochemical staining for markers of selfish clones (enhanced MAGEA4 and pAKT  
318 immunostaining), followed by laser capture microdissection and targeted resequencing.



319 Strikingly, we previously identified and validated the identical *FGFR2* variant, strongly  
320 suggesting that this large mutant clone is present within a significant portion of a single  
321 seminiferous tubule that tracks across adjacent testis slices (Maher et al. 2016a). To seek  
322 further examples, we undertook a new analysis of putative mutant clones within Tes2E, a  
323 FFPE tissue block adjacent to the Tes2F slice, to identify individual tubular cross-sections  
324 exhibiting enhanced MAGEA4 immunostaining; laser capture microdissection of six distinct  
325 groups of tubular cross-sections, followed by PCR and Illumina sequencing confirmed the  
326 presence of the *FGFR2* c.755C>G (p.Ser252Trp – Apert syndrome) and *PTPN11* c.214G>C  
327 (p.Ala72Pro – Noonan syndrome) mutations in distinct enhanced MAGEA4-tubules,  
328 consistent with the geographic location of these specific variants identified by deep-  
329 sequencing in the adjacent Tes2F slice (Figure 3). For the three other testes, FFPE blocks were  
330 not available.

331

332 **Figure 3. Visualization of mutant tubules in Testis 2**

333 (A) A 5 µm thin section from Tes2E, a FFPE block of tissue adjacent to the testis slice 2F, immunostained with  
334 anti-MAGEA4 antibody to label spermatogonia. Seminiferous tubules with enhanced MAGEA4  
335 immunopositivity, suggestive of the presence of mutant clones are labelled with small red pins and boxed. Scale  
336 bar = 5 mm. (B) High magnification view of cross-sections with MAGEA4-enhanced immunopositivity in two  
337 localized areas are labelled with dotted lassoes representing the laser-microdissected regions. Scale bars = 100  
338 µm. (C) Results from targeted resequencing of the microdissected seminiferous tubules labelled by dotted  
339 lassoes in (B) viewed in IGV (Integrated Genome Viewer); spontaneous pathogenic *FGFR2* c.755C>G #7 (top) and  
340 *PTPN11* c.214G>C #25 (bottom) variants were identified in DNA extracted from microdissected tubule cross-  
341 sections, but not in DNA from the whole tissue section. Comparison of the MAGEA4 section (A) with adjacent  
342 testis slice 2F from the Raindance screen (D) (the same image as in Figure 1 but showing only the targeted *FGFR2*  
343 and *PTPN11* mutations), shows that both variants match to a mutation previously identified in the corresponding  
344 position of testis slice 2F.

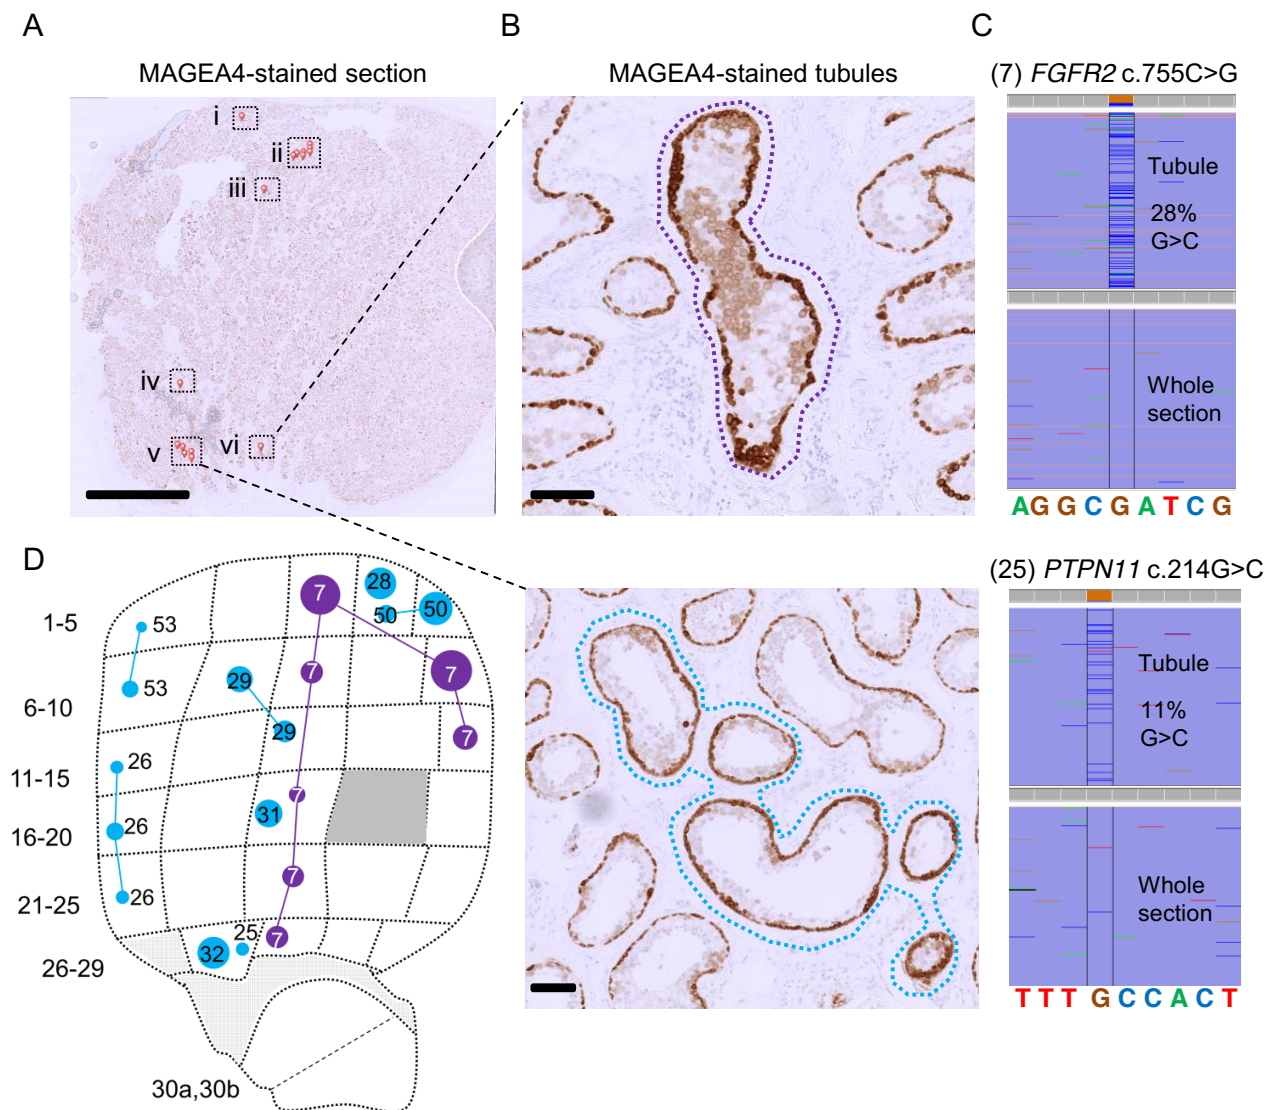

345 **Figure 3**

346

347

348 **DISCUSSION**

349 We present a new broad-scale approach to studying clonal *de novo* germline mutations

350 directly in human adult testes, the tissue where the majority of DNMs originate. Utilizing

351 massively parallel multiplex PCR and ultra-deep sequencing of 51.5 kb in 276 discrete human

352 testicular biopsies followed by the implementation of a statistical prioritization calling

353 strategy, we identified 61 different variants in a total of 111 mutation-positive biopsies, 59 of  
354 which encode non-synonymous substitutions (Table 1).

355

356 Several observations support the notion that the mutations identified are strongly enriched  
357 for clonal events that are promoted by positive selection of mutant stem cells via the  
358 phenomenon of selfish spermatogonial selection. Out of the 61 validated variants (Table 1),  
359 43 are located in five (*FGFR2*, *FGFR3*, *KRAS*, *PTPN11*, *RET*) of the six genes associated with  
360 strong prior experimental evidence for this process (Supplementary Table 1). As detailed in  
361 Table 1 and illustrated in Figure 2 and Supplementary Figure 3, the vast majority of variants  
362 identified across these five genes overlap with those observed in dominant congenital  
363 disorders and/or cancer, strongly suggestive of a functional role via a gain-of-function  
364 mechanism. The most commonly observed individual mutation was *FGFR2* c.755C>G  
365 (p.Ser252Trp - Apert syndrome) detected in 23 biopsies. In this and other cases, the  
366 identification of identical variants in multiple neighboring testis biopsies (Figure 1 and  
367 Supplementary Figure 2) is supportive of clonal expansion along the length of the  
368 seminiferous tubules, and in three cases this process could be directly validated at a cellular  
369 level by visualizing the selfish expansion characterized by enhanced MAGEA4 staining in the  
370 adjacent testis block (Figure 3 and (Maher et al. 2016a)). The largest number of mutations  
371 was observed for *PTPN11* (encoding the SHP2 tyrosine phosphatase), in which we identified  
372 20 different variants (across 33 biopsies) (Table 1 and Figure 2B). We observed 12 distinct  
373 variants located within the N-SH2 domain of SHP2, a region of the protein known to repress  
374 the catalytic phosphatase domain in its wild-type state (Neel et al. 2003), including each of  
375 the possible nucleotide substitutions at *PTPN11* c.215C encoding three distinct amino acids  
376 (p.Ala72Asp, p.Ala72Gly and p.Ala72Val) that have been associated with Noonan syndrome

377 or oncogenesis. This wide mutational spectrum is consistent with epidemiological data that  
378 concur that *PTPN11*-associated Noonan syndrome mutations have a high spontaneous birth  
379 prevalence (~1/10,000 births) (Goriely and Wilkie 2012). We also identified two dinucleotide  
380 substitutions in *PTPN11*: both the c.226\_227delGAinsCT (p.Glu76Leu (#30)) and the  
381 c.1504\_1505delTCinsAA (p.Ser502Lys (#55)) variants encode amino acid substitutions that,  
382 owing to the nature of the genetic code, cannot arise from single-nucleotide changes. These  
383 observations are reminiscent of other previously described selfish mutations encoded by  
384 double and triple substitutions, which in some cases, were shown to result via a ‘double-hit’  
385 mechanism (Goriely et al. 2005; Goriely and Wilkie 2012; Giannoulatou et al. 2013). In  
386 humans, the *de novo* tandem mutation rate is estimated to be ~0.3% of the single nucleotide  
387 variant rate (Besenbacher et al. 2016); in this small set of 61 variants, we find a ~10-fold  
388 enrichment over the background rate.

389

390

391 Given this strong support for positive clonal selection of pathogenic variants in previously  
392 known selfish genes, the next question is whether the other 18 validated variants present in  
393 novel candidate genes might also signal the presence of selfish selection. We first excluded  
394 from consideration one variant, *NF1* c.2280G>A p.(Met760Ile) (variant #49), which presented  
395 with a different pattern of occurrence characterized by an extended geographical distribution  
396 across ~1/3 of the testis from individual Tes4, raising the possibility of an early post-zygotic  
397 (as opposed to adult-onset) mutational event (Supplementary Figure 5). Although this *NF1*  
398 variant exhibits a high CADD (24.6)/Polyphen score, has been reported in one case of lung  
399 cancer (Redig et al. 2016) and is located within the cysteine-serine-rich domain (CSRD), a  
400 region where several missense mutations associated with breast cancer and

401 neurofibromatosis have been identified (Koczkowska et al. 2018), its pathogenic status - and  
402 potential for positive selection - remain uncertain.

403

404 Of the remaining 17 variants, all but three are accounted for by six genes (*BRAF*, *CBL*, *MAP2K1*,  
405 *MAP2K2*, *RAF1* and *SOS1*) encoding members of the RAS-MAPK pathway, among which nine  
406 variants have previously been reported in either congenital disorders or cancer (Table 1 and  
407 Supplementary Figure 3). Moreover, for several variants (*BRAF* p.Gly469Ala, *MAP2K1*  
408 p.Lys57Asn and p.Gln56Pro, *MAP2K2* p.Cys125Ser, *RAF1* p.Ser257Leu and p.Pro261Ala),  
409 direct biochemical evidence of a dominant gain-of-function activity is available (Wan et al.  
410 2004; Kobayashi et al. 2010; Van Allen et al. 2014; Arcila et al. 2015). In fact, only three  
411 validated variants (#1,2,47), for which evidence of involvement in selfish selection is weak or  
412 can be ruled out, were found in genes (*APC*, *AKT3*, *LRP5*) that function outside the RTK-RAS-  
413 MAPK pathway (see Supplementary Note). Hence, although only 41.9% of the callable  
414 sequence of our panel comprised RTK-RAS-MAPK candidate genes, 95% (57/60) of the  
415 validated variants represented known or very likely pathogenic changes within members of  
416 this signaling pathway (p value = 4.233e-13, Fisher's two tailed test), reinforcing the proposal  
417 that activation of the RAS-MAPK pathway is the predominant mechanism underlying selfish  
418 spermatogonial selection (Goriely et al. 2003; Goriely et al. 2009; Goriely and Wilkie 2012;  
419 Maher et al. 2016a). Mutations in other core cellular pathways in human testes may either  
420 not be associated with positive selection or may lead to milder clonal expansions that will  
421 require more sensitive screening approaches to uncover. Although it can be difficult formally  
422 to distinguish signals of selection from normal turnover/neutral drift dynamics whereby the  
423 random loss of some clones is compensated by the expansion of others over time (Klein et al.  
424 2010b; Simons 2016; Zink et al. 2017), the highly significant enrichment of functionally

425 significant (biochemically activating) mutations affecting a single signaling pathway argues  
426 against a neutral process.

427

428 Among the variants we identified, we observed a high proportion of strongly oncogenic  
429 mutations with 23 of the 35 non-synonymous variants reported in COSMIC (v82) having never  
430 been described as constitutional mutations (Table 1). Strong gain-of-function mutations  
431 would be more likely to promote efficient expansion of spermatogonial stem cells and result  
432 in larger clones that are easier to detect. However, in order to be transmitted, the mutations  
433 must be compatible with formation of functional sperm and with embryonic development.  
434 We previously showed that tubules with spermatogonia harboring strongly oncogenic  
435 variants are associated with reduced numbers of post-meiotic cells (Maher et al. 2016a). This  
436 would represent a mechanism by which the testis ‘filters’ the transmission of pathogenic  
437 mutations across generations, although proof of this concept would require development of  
438 ultra-sensitive assays to screen large numbers of sperm samples. It is noteworthy that despite  
439 the relative abundance of strongly oncogenic mutations in the adult male germline, testicular  
440 tumors originating from adult spermatogonia (spermatocytic tumors) are extremely rare,  
441 with an incidence of ~1 per million men and are mostly benign in nature (Ghazarian et al.  
442 2015; Giannoulatou et al. 2017).

443

444 The age range of the testes analyzed in this study was highly skewed, with four being sampled  
445 from older individuals (aged 71-90 years), and one (Tes5J) from a 34-year old man. While for  
446 three of the four older individuals we identified multiple mutation-positive biopsies, Tes5J  
447 from the younger man contained only two mutation-positive biopsies – likely representing a  
448 single clonal event - carrying the oncogenic *CBL* c.1211G>A (p.Cys404Tyr) variant (at VAF 0.5-

449 0.6%), in keeping with the expectation that the prevalence and size of mutant clones increases  
450 with time. It was however surprising that no variants were detected in Tes3D, given the  
451 advanced age of the donor (87 years). Although it is possible that this individual may have had  
452 a low propensity to accumulation of selfish mutations, a more likely explanation is that few  
453 or no germ cells were present in this testis slice, either due to Sertoli-cell only syndrome or  
454 due to age-related atrophy (Paniagua et al. 1987). Unfortunately, as no tissue had been  
455 preserved for histological analysis, we were unable to determine the status of  
456 spermatogenesis in this sample.

457

458 Our study has several technical limitations. The majority of variants identified were present  
459 at VAFs <1%, close to the typical detection limits attributable to the error rates associated  
460 with DNA damage ( $10^{-2}$ - $10^{-4}$ ) (Arbeithuber et al. 2016; Chen et al. 2017), PCR ( $10^{-4}$ - $10^{-6}$ )  
461 (Hestand et al. 2016; Potapov and Ong 2017) and Illumina sequencing ( $\sim 10^{-3}$ ) (Minoche et al.  
462 2011) (Salk et al. 2018). To account for such technical confounders, we employed a  
463 conservative custom statistical approach to determine the background error rate at each  
464 position and to prioritize variants (Supplementary Figure 1). Although we confirmed variants  
465 with a frequency as low as 0.06% using this approach, the majority (81.8%) of the prioritized  
466 variants called in single amplicon at VAFs of 0.1-0.2% (Tier 3) were false positives. In the  
467 twelve samples amplified and sequenced in duplicate, only 7 of 15 variants were called in  
468 both replicates (Supplementary Table 4). The best predictor of true positives was the  
469 presence of a call in more than one amplicon (100% validation rate); for calls in single  
470 amplicons the best predictor was the pathogenicity of the variant (17 of 18 (94.4%)  
471 pathogenic variants vs. 5 of 30 (16.7%) without prior disease association validated). Broad-  
472 scale approaches that target both DNA strands and use unique molecular indexes such as

473 Duplex sequencing (Kennedy et al. 2014) or smMIPs (Hiatt et al. 2013) (used here to validate  
474 a subset of variants) represent valuable alternatives to direct PCR amplification in future  
475 studies to reduce background errors (Salk et al. 2018). Overall 14% of the designed amplicons  
476 did not pass quality control (due to insufficient coverage, mapping error...), which included  
477 those targeting candidate PAE mutations such as eight mutational hotspots in *FGFR3*, six in  
478 *PTPN11*, one in *RET* (p.Val804), and other key hotspots in *SKI* (Shprintzen-Goldberg  
479 syndrome), *SETBP1* (Schinzel-Giedion syndrome) and *AKT1* (p.Glu17Lys – Proteus syndrome,  
480 oncogenesis). Although considered to be the most frequently mutated nucleotide in the  
481 germline with a birth prevalence of ~1:30,000 (Bellus et al. 1995), we did not detect the  
482 *FGFR3* c.1138G>A or c.1138G>C achondroplasia-associated mutations due to exclusion of this  
483 region because of insufficient coverage (<5,000x) (Supplementary Table 2; Supplementary Fig  
484 3E).

485

486 In summary this work represents a new approach to studying DNMs directly in their tissue of  
487 origin. By utilizing the clonal nature of mutations that leads to focal enrichment, we  
488 circumvented the technical difficulties associated with calling DNMs in single sperm or the  
489 poor DNA quality associated with immunopositive tubules from FFPE material. In a single  
490 biopsy a whole population of *de novo* mutations can be assessed. Studying mutations within  
491 the testis facilitates identification of mutations and pathways under positive selection in  
492 spermatogonia but that may be incompatible with life, either by impairing gamete  
493 differentiation and sperm production or by causing early embryonic lethality. Our approach  
494 reveals the prevalence and geographical extent of clonal mutations in normal human testes,  
495 suggesting that the ageing male germline is a repository for functionally significant, often  
496 deleterious mutations. Based on an estimated total birth prevalence of DNMs causing



497 developmental disorders of 1 in 295 (DDD 2017), such PAE mutations may contribute 5-10%  
498 of the total burden of pathological mutations, depending on paternal age. Investigating the  
499 clonal nature of spontaneous testicular variants also provides insights into the regulation of  
500 the poorly-studied human spermatogonial stem cell dynamics and how spontaneous  
501 pathogenic mutations hijack homeostatic regulation in this tissue to increase their likelihood  
502 of transmission to the next generation.

503

504

## 505 **METHODS**

### 506 **Testis samples**

507 Ethical approval was given for the use of human testicular tissue by the Oxfordshire Research  
508 Ethics Committee A (C03.076: Receptor tyrosine kinases and germ cell development:  
509 detection of mutations in normal testis, testicular tumors and sperm). Testes from five men  
510 aged 34, 71, 83, 87 and 90 years were either commercially sourced or obtained locally from  
511 research banks or post-mortems, with appropriate consent (Supplementary Table 5). Each  
512 testis was cut into slices ~3-5 mm thick and either stored frozen at -80°C or formalin-fixed.  
513 After thawing slices of frozen testis, extraneous tissue (epididymis or tunica albuginea) was  
514 removed and slices were further dissected into 21-36 biopsies (Supplementary Table 5).  
515 Biopsies were pulverized using a pestle and DNA extraction was performed using the Qiagen  
516 DNeasy Blood & Tissue Kit. Samples with insufficient DNA quantity (determined using Qubit  
517 fluorometer (Life Technologies)) or quality (determined using Nanodrop spectrophotometer  
518 (Thermo Scientific)) were excluded, resulting in a total of 276 biopsies [Tes1D (34 biopsies),  
519 Tes2F (30 biopsies), Tes3D (32 biopsies), Tes4B-4G (153 biopsies from 6 slices), Tes5J (27  
520 biopsies)].

521

522 **RainDance library preparation and sequencing**

523 Primer pairs (tailed with common RainDance sequences (RD)) targeting 500 genomic regions  
524 (20-169 bp [average 133 bp, median 143 bp]) in 71 genes (66.5 kb in total) were designed by  
525 RainDance Technologies. The panel comprised mutational hotspots in the six established PAE  
526 genes, genes encoding other RTKs and members of the RAS-MAPK signaling pathway, genes  
527 in other pathways associated with spontaneous disorders that display narrow mutational  
528 spectra suggestive of gain-of-function effects but lacking epidemiological data for paternal  
529 age-effect, oncogenes commonly mutated in cancer, some of which are also associated with  
530 germline disorders, and regions of 10 control genes. Details of all targeted regions and  
531 primers used for amplification are provided in Supplementary Table 6. To maximize the  
532 number of different molecules amplified, massively parallel simplex PCR was performed using  
533 the RainDance Thunderstorm target enrichment system following the manufacturer's  
534 instructions. Briefly, for each sample, 6 µg of genomic DNA (gDNA) was sheared to an average  
535 size of 3,000 bp (using a Covaris blue AFA miniTUBE) and purified using a minElute column  
536 (Qiagen). One microliter (out of 20 µl) was run on a gel to verify that the gDNA had been  
537 sheared to the correct size range and the remaining gDNA was quantified using a Qubit  
538 fluorometer (Life Technologies). The custom primer library, 1.75 µg of sheared gDNA and PCR  
539 mix (Platinum Taq Polymerase High Fidelity reagents (Invitrogen), 2.5 mM MgSO<sub>4</sub>, 0.35 µM  
540 dNTPs, 0.6 M betaine, 7% dimethyl sulfoxide (DMSO), in 25 µl volume) were loaded onto a  
541 ThunderStorm enrichment chip (48 samples at a time). Droplets containing up to 5 primer  
542 pairs were merged with gDNA droplets to generate an average of  $2 \times 10^6$  droplets per sample  
543 (525,000 haploid genomes; average of 1 haploid genome per 3-4 droplets; ~1000  
544 genomes/individual primer pair (Supplementary Figure 1). Following the merge, libraries

545 were PCR-amplified (94°C for 2 min; 54 cycles of 94°C, 54°C, 68°C for 30 s each; 68°C for 10  
546 min) and the emulsion was broken down with 75-100 µl of Droplet Destabilizer (RainDance)  
547 before being purified using AMPure beads (Agencourt). An aliquot of each sample was run on  
548 a Bioanalyzer high sensitivity chip (Agilent) to verify the amplification profile and determine  
549 the sample concentration. Sixteen different Illumina sequencing tailed libraries were  
550 constructed using a set of barcoded (8 bp barcode (BC)) Illumina PE2-RD-rev adaptors, a  
551 common PE1-RD-Fwd, 4 ng of merged amplicons and Phusion Hot Start Flex DNA Polymerase  
552 (New England BioLabs) with 8% DMSO (98°C for 30 s, followed by 10 cycles of 98°C for 15 s,  
553 56°C for 30 s, 72°C for 40 s, and a final extension at 72°C for 10 min). Following purification  
554 (Qiagen MinElute), the relative concentration of the secondary tailing PCR samples was  
555 estimated by Real-Time PCR using PE1 and PE2 primers. For each of the 16 libraries, 18  
556 samples with BC1-18 were pooled in equimolar ratio and each final library was diluted to 10  
557 nM. A total of 288 samples (264 singletons and 12 in duplicate) were amplified across 6  
558 ThunderStorm enrichment chips (48 samples each) and subsequently ultra-deep sequenced  
559 (~22,000x) on two flow cells (16 lanes; 18 samples per lane) of Illumina HiSeq 2000 (2 x 100  
560 bp) using RD-Read1 and RD-Read2 custom sequencing primers generating 14-20 x 10<sup>7</sup> paired-  
561 end reads per library.

562

### 563 **Sequence alignment and variant calling and prioritization**

564 Low quality reads with more than 20 bases below Q20, read pairs with one or two short (<50  
565 bp) reads and reads pairs with unmatched or mismatched sequences between the forward  
566 and reverse primer pairs expected for each amplicon were removed. Reads passing QC (on  
567 average 86% of reads) were aligned to the human genome (hg19) using BWA-MEM version  
568 0.7.10 (Li 2014) with default parameter settings. Primer sequences were included in the

569 alignment but ignored during variant quantification. The Python library Pysam was used to  
570 fetch reads mapped to each amplicon and mapped bases (indicated as letter "M") were  
571 identified from the CIGAR string. Pileup was then performed for each amplicon  
572 independently. Nine amplicons that did not map to the targeted genomic regions were  
573 excluded from subsequent analyses (Supplementary Table 2). Reads with more than 10 non-  
574 reference bases were removed (<1% of coverage on average). For amplicons shorter than 200  
575 bp, to avoid double-counting reads at positions where Read 1 and Read 2 overlapped, only  
576 the base with the higher quality was considered.

577

578 Data exploration of the non-consensus variant counts within each amplicon across the  
579 different samples revealed clear data structure with differences between flow cells,  
580 sequencing lanes, coverage depths and base quality scores. To reduce false-positive calls,  
581 primer sequences were trimmed and only variants supported by at least 10 reads were called.  
582 To account for the technical confounders, the data were normalized (accounting for flow cell,  
583 lane, and average base quality at each position) using a simple linear model

584

$$y_{i,s} = f_s + l_s + n_s + q_{i,s} + \epsilon_{i,s}$$

585 where  $y_{i,s}$  is the nucleotide count for sample  $s$  at position  $i$ ;  $f_s$ ,  $l_s$  and  $n_s$  are the flow cell  
586 identifier, the sequencing lane identifier, and individual identifier for sample  $s$  respectively;  
587 and  $q_{i,s}$  is the average base quality of sample  $s$  at position  $i$ . We used the glm package in R for  
588 model inference (`glm(y ~ f + l + n + q, family=gaussian())`). Values of  $\epsilon_{i,s}$  are the normalized  
589 signals after accounting for the technical confounders and were used as the inputs for the  
590 subsequent analyses. To further account for the effect of the sequencing lane structure, we  
591 removed the median effect from each lane to reduce the background signal  $g_{i,s} = \epsilon_{i,s} -$   
592  $\text{median}[\epsilon_{i,s} \text{ for all } s \text{ in same lane as } s]$ , before stabilizing the variance using the transformation

593  $g'_{i,s} = g_{i,s} / \text{IQR}[g_{i,\cdot}]$ , where  $\text{IQR}[g_{i,\cdot}]$  is the inter-quantile range at site  $i$  across all samples.  
594 Following these normalization steps, variant calling was performed using a normal model to  
595 test for an increase in non-consensus variant calls. Assuming that under the null hypothesis  
596 the normalized variant quantification follows a normal distribution  $H_0: P(g_i) = N(\mu_i, \sigma_i^2)$  with  
597 mean  $\mu_i$  and variance  $\sigma_i^2$ , estimated using signals from all samples. We applied a one-sided z  
598 test in R (`pnorm(g, mean=mu0, sd=sigma2, lower.tail=FALSE)`). Non-consensus calls at each  
599 genomic position across the 288 samples were tested independently in each amplicon that  
600 passed QC. Variant prioritization was performed using a P-value cutoff of  $-\log_{10}P > 20$ , which  
601 resulted in a total of 19,625 genomic positions with at least one non-reference call.

602

603 As samples or amplicons with an excessive number of variants were more likely to represent  
604 technical artefacts, these outliers were identified using a Chi Square ( $\chi^2$ ) test, where the  
605 expected number of substitutions is defined as the median across all samples. Using a  $\chi^2$   
606 threshold of  $-\log_{10}P > 3$ , seven amplicons and 185 sample-mutation combinations were  
607 removed from further analysis. Notably, the majority of these were C>A (=G>T) variant calls  
608 (Supplementary Figure 4), which represent a known mutational signature associated with  
609 oxidative stress that likely arose during sample preparation (Arbeithuber et al. 2016; Chen et  
610 al. 2017). Further filtering was performed to remove potential sources of artefacts: calls  
611 positioned 1 base from the amplification primer 3'-end were excluded; calls with a maximum  
612 VAF of  $\geq 3\%$  were excluded to avoid calling SNPs and to eliminate gross alignment errors or  
613 calling of non-consensus variants resulting from homologous genomic regions or pseudogene  
614 amplification; positions with a median depth coverage below 5,000x across all samples were  
615 excluded (this removed a 53 further amplicons (10.6%) from the analysis; Supplementary  
616 Table 2). This resulted in a total of 5729 calls (5659 distinct variants) at 5421 positions, the

617 majority (90.2%) of which were made in a single amplicon and sample. As singleton calls were  
618 more likely to represent PCR or sequencing artefacts, we further prioritized calls made in two  
619 or more samples and/or present in overlapping amplicons. To exclude potential batch effects,  
620 variants were excluded if all calls were made from a single library and the number of calls was  
621  $>3$ . This strategy identified 374 variants at 361 genomic positions. VAFs across all samples at  
622 each of the 361 genomic positions were plotted and manually inspected for sequencing  
623 library preparation or batch effects; raw sequencing reads from calls with suspected sequence  
624 misalignment were visualized in Integrative Genomics Viewer (IGV) (Robinson et al. 2011).  
625 Variant calls showing evidence of library-specific batch or sequence misalignment effects  
626 were excluded from further analysis. Variants in *PTPN11* that matched bases at homologous  
627 positions in one of its four pseudogenes were also excluded. The remaining 115 variants at  
628 105 genomic positions were annotated with ANNOVAR version 2015Jun17 (Wang et al. 2010).  
629

### 630 **Variant validation**

631 DNA from at least one putative-positive biopsy sample and at least 8 control samples  
632 (unrelated blood gDNA and gDNA from other testicular biopsies) was screened by PCR or  
633 single molecule molecular inversion probes (smMIPs) (primer and smMIP details in  
634 Supplementary Table 6) and sequenced using Illumina MiSeq 300v2 (PCR) or 150v3 (smMIP)  
635 kits (further details in Supplementary Methods). Demultiplexed reads were aligned to the  
636 human genome (hg19) using BWA-MEM version 0.7.12 (Li 2014). Summary tables of the calls  
637 across the aligned target region for PCR and smMIPs were generated using SAMtools mpileup  
638 and a custom script (Amplimap – see Supplementary Methods), respectively. A base call was  
639 only considered if its mapping quality was  $\geq Q20$  and phred score  $\geq Q30$ . Validated variants  
640 were annotated according to the following transcripts - *APC*: NM\_001127510, *AKT3*:

641 NM\_005465, *BRAF*: NM\_004333, *CBL*: NM\_005188, *FGFR2*: NM\_000141, *FGFR3*:  
642 NM\_000142, *KRAS*: NM\_033360, *LRP5*: NM\_002335, *MAP2K1*: NM\_002755, *MAP2K2*:  
643 NM\_030662, *NF1*: NM\_001042492, *PTPN11*: NM\_002834, *RAF1*: NM\_002880, *RET*:  
644 NM\_020975, *SOS1*: NM\_005633.

645

#### 646 **Immunohistochemistry, microdissection and targeted mutation screen**

647 Where mutations had been identified in frozen sections for which an adjacent FFPE tissue  
648 block was available, we attempted to visualize the corresponding mutant clone in sections of  
649 the FFPE block. Immunohistochemical staining with anti-MAGEA4 antibody (clone 57B, gifted  
650 by Prof. Giulio C. Spagnoli) to identify tubules with enhanced spermatogonial MAGEA4  
651 staining, followed by laser capture microdissection and DNA extraction of adjacent FFPE  
652 sections, was performed as described (Maher et al. 2016a). DNA was subsequently amplified  
653 by PCR (40 cycles) using CS-tagged primers (Supplementary Table 6) and barcoded for Illumina  
654 MiSeq 300v2 sequencing as described above (see also Supplementary Methods). DNA  
655 samples extracted from the whole tissue section and from adjacent tubules with a normal  
656 MAGEA4 staining appearance were used as controls. Reads were aligned to the human  
657 genome (hg19) using BWA-MEM version 0.7.12 (Li 2014) and were visualized in IGV.

658

#### 659 **DATA ACCESS**

##### 660 **Databases and online resources**

661 gnomAD: <http://gnomad.broadinstitute.org/>

662 COSMIC: <http://cancer.sanger.ac.uk/cosmic/>

663 ClinVar: <https://www.ncbi.nlm.nih.gov/clinvar/>

664 OMIM: <http://www.omim.org/>

665

666 **ACKNOWLEDGEMENTS**

667 The authors thank Indira Taylor, Marie Bernkopf and Yan Zhou for technical support, John  
668 Frankland and Tim Rostron for dideoxy-sequencing and the High-Throughput Genomics core  
669 at the Wellcome Trust Centre for Human Genetics for generation of the Illumina sequencing  
670 data. We thank the UCL Cancer Institute Genomics and Genome Engineering Core Facility  
671 (supported by the Cancer Research UK – UCL Centre), for providing access to the RainDance  
672 Thunderstorm platform, which was purchased on a Wellcome multi-user grant (99148). This  
673 work was primarily supported by grants from the Wellcome (grant 091182 to A.G., G.McV.  
674 and A.O.M.W.; grant 102731 to A.O.M.W. and studentship 105361 to H.K.R.), the Simons  
675 Foundation (332759 to A.G.) and the National Institute for Health Research (NIHR) Oxford  
676 Biomedical Research Centre Programme (to A.G.). S.B., P.D. and S.S. were supported by a  
677 Wellcome programme grant and D.P. was supported by EU-FP7. We acknowledge funding  
678 from the Medical Research Council (MRC) through the WIMM Strategic Alliance (G0902418  
679 and MC\_UU\_12025) and the support of the High-Throughput Genomics core facility by the  
680 Wellcome grant 090532. The funders had no role in study design, data collection and analysis,  
681 decision to publish, or preparation of the manuscript.

682

683 **Author contributions:**

684 Experiments: GJM, HKR, AG; Technical support: HM, PD, DSP, SS, SB; Data analysis: GM, HKR,  
685 ZD, NK, EG, GMcV, AG; Manuscript writing: GJM, AOMW, AG; Conception, design and  
686 supervision: GMcV, AOMW, AG

687

688



689 **Supplementary material**

690

691 **Supplementary Figure 1 – Schematic of experimental design.**

692

693 **Supplementary Figure 2 – Distribution of mutations in slices Tes4B-4G from individual 4.**

694 Testicular biopsy numbers are located outside and to the left of each testis slice. Each variant  
695 has a distinct number (as listed in Table 1) and is colored according to gene: *FGFR2* (purple),  
696 *FGFR3* (orange), *KRAS* (black), *PTPN11* (blue), *RET* (pink), newly associated gene (red), NF1  
697 mosaic (yellow with red surround). The size of each circle is proportional to the mutation  
698 frequency. Lines connect biopsies in the same slice with identical mutations; in cases where  
699 more than two biopsies are positive, the path of the clone has been arbitrarily drawn. Solid  
700 grey regions represent biopsies that were not sequenced due to quality control issues.  
701 Gridded grey regions represent non-tubular regions of tissue.

702

703 **Supplementary Figure 3 – Individual gene plots showing the location of spontaneous  
704 mutations identified in testicular biopsies for AKT3 (A), APC (B), BRAF (C), CBL (D), FGFR3  
705 (E), KRAS (F), LRP5 (G), MAP2K1 (H), MAP2K2 (I), NF1 (J), RAF1 (K), RET (L), and SOS1 (M).**

706 (Panel I) Validated variants (with VAF on *y*-axis) positioned along the amino acid sequence of  
707 the relevant protein (*x*-axis, see Panel V). (Panel II) Location and size of amplicons used to  
708 sequence main hotspots of the relevant genes are plotted on the *x*-axis. Median coverage per  
709 amplicon is plotted on the *y*-axis. Line indicates coverage cut-off of 5,000x. (Panel III) Number  
710 of reported constitutional variants encoding amino acid substitutions associated with  
711 developmental disorders (sqrt scale). (Panel IV) Number of reported somatic amino acid  
712 substitutions in cancer (COSMIC v82). (Panel V) Protein domains. Annotations are based on  
713 the transcripts accessions listed in the methods.

714

715 **Supplementary Figure 4 - Variant allele frequencies of *KRAS* c.182A>G (p.Gln61Arg) and  
716 *LRP5* c.291C>T (p.Ala97Ala) in all 288 samples.**

717

718 **Supplementary Figure 5 – Heatmap of *NF1* c.2280G>A and *KRAS* c.35G>A.** Heatmap of G>A  
719 variants in *NF1* (called in 9 biopsies in Tes4 – surrounded by black lines) and *KRAS* (called in 6  
720 biopsies in Tes4 – surrounded by black lines) reveals that there were a number of additional  
721 pieces with relatively high levels of the NF1 c.2280G>A variant that were not called. Heatmaps  
722 of the same variants in Tes1 and Tes2 demonstrate that the higher levels are specific to Tes4.

723

724 **Supplementary Figure 6 – Mutation loadings per sample.**

725 Note that a number of samples show excessive C>A(G>T) mutations, which is typically  
726 associated with oxidative stress during the experimental procedure. Filtering of specific  
727 sample-mutation combinations and amplicons with excessive number of variants resulted in  
728 6054 variant calls.

729

730

731 **List of Supplementary Tables and other supplementary files:**

732 **Supplementary Table 1 – Literature review showing loci with evidence for selfish selection**

733 **Supplementary Table 2 – Coverage analysis of 500 amplicons**

734 **Supplementary Table 3 – Table of prioritized calls (Tiers 1, 2, 3, 4)**

735 **Supplementary Table 4 – Variant calls in replicate samples**

736 **Supplementary Table 5 – Sample information**  
737 **Supplementary Table 6 – Primers and smMIPs**  
738 **Supplementary Note**  
739 **Supplementary Methods**  
740  
741  
742

## 743 **References**

- 744 Acuna-Hidalgo R, Bo T, Kwint MP, van de Vorst M, Pinelli M, Veltman JA, Hoischen A, Vissers  
745 LE, Gilissen C. 2015. Post-zygotic Point Mutations Are an Underrecognized Source of  
746 De Novo Genomic Variation. *Am J Hum Genet* **97**: 67-74.
- 747 Acuna-Hidalgo R, Sengul H, Steehouwer M, van de Vorst M, Vermeulen SH, Kiemeny L,  
748 Veltman JA, Gilissen C, Hoischen A. 2017. Ultra-sensitive Sequencing Identifies High  
749 Prevalence of Clonal Hematopoiesis-Associated Mutations throughout Adult Life. *Am*  
750 *J Hum Genet* **101**: 50-64.
- 751 Arbeithuber B, Makova KD, Tiemann-Boege I. 2016. Artfactual mutations resulting from  
752 DNA lesions limit detection levels in ultrasensitive sequencing applications. *DNA Res*  
753 **23**: 547-559.
- 754 Arcila ME, Drilon A, Sylvester BE, Lovly CM, Borsu L, Reva B, Kris MG, Solit DB, Ladanyi M.  
755 2015. MAP2K1 (MEK1) Mutations Define a Distinct Subset of Lung Adenocarcinoma  
756 Associated with Smoking. *Clin Cancer Res* **21**: 1935-1943.
- 757 Bellus GA, Hefferon TW, Ortiz de Luna RI, Hecht JT, Horton WA, Machado M, Kaitila I,  
758 McIntosh I, Francomano CA. 1995. Achondroplasia is defined by recurrent G380R  
759 mutations of FGFR3. *Am J Hum Genet* **56**: 368-373.
- 760 Besenbacher S, Sulem P, Helgason A, Helgason H, Kristjansson H, Jonasdottir A, Magnusson  
761 OT, Thorsteinsdottir U, Masson G, Kong A et al. 2016. Multi-nucleotide de novo  
762 Mutations in Humans. *PLoS Genet* **12**: e1006315.
- 763 Campbell IM, Shaw CA, Stankiewicz P, Lupski JR. 2015. Somatic mosaicism: implications for  
764 disease and transmission genetics. *Trends Genet* **31**: 382-392.
- 765 Campbell IM, Yuan B, Robberecht C, Pfundt R, Szafranski P, McEntagart ME, Nagamani SC,  
766 Erez A, Bartnik M, Wisniewiecka-Kowalnik B et al. 2014. Parental somatic mosaicism  
767 is underrecognized and influences recurrence risk of genomic disorders. *Am J Hum*  
768 *Genet* **95**: 173-182.
- 769 Chen L, Liu P, Evans TC, Jr., Ettwiller LM. 2017. DNA damage is a pervasive cause of  
770 sequencing errors, directly confounding variant identification. *Science* **355**: 752-756.
- 771 Choi SK, Yoon SR, Calabrese P, Arnheim N. 2008. A germ-line-selective advantage rather  
772 than an increased mutation rate can explain some unexpectedly common human  
773 disease mutations. *Proc Natl Acad Sci USA* **105**: 10143-10148.
- 774 Choi SK, Yoon SR, Calabrese P, Arnheim N. 2012. Positive selection for new disease  
775 mutations in the human germline: evidence from the heritable cancer syndrome  
776 multiple endocrine neoplasia type 2B. *PLoS Genet* **8**: e1002420.
- 777 Coombs CC, Zehir A, Devlin SM, Kishtagari A, Syed A, Jonsson P, Hyman DM, Solit DB,  
778 Robson ME, Baselga J et al. 2017. Therapy-Related Clonal Hematopoiesis in Patients  
779 with Non-hematologic Cancers Is Common and Associated with Adverse Clinical  
780 Outcomes. *Cell Stem Cell* **21**: 374-382 e374.
- 781 Dakouane Giudicelli M, Serazin V, Le Sciellour CR, Albert M, Selva J, Giudicelli Y. 2008.  
782 Increased achondroplasia mutation frequency with advanced age and evidence for  
783 G1138A mosaicism in human testis biopsies. *Fertil Steril* **89**: 1651-1656.
- 784 DDD. 2017. Prevalence and architecture of de novo mutations in developmental disorders.  
785 *Nature* **542**: 433-438.
- 786 Eboreime J, Choi SK, Yoon SR, Arnheim N, Calabrese P. 2016. Estimating Exceptionally Rare  
787 Germline and Somatic Mutation Frequencies via Next Generation Sequencing. *PLoS*  
788 *One* **11**: e0158340.

- 789 Genovese G, Kahler AK, Handsaker RE, Lindberg J, Rose SA, Bakhoum SF, Chambert K, Mick  
790 E, Neale BM, Fromer M et al. 2014. Clonal hematopoiesis and blood-cancer risk  
791 inferred from blood DNA sequence. *N Engl J Med* **371**: 2477-2487.
- 792 Ghazarian AA, Trabert B, Graubard BI, Schwartz SM, Altekruse SF, McGlynn KA. 2015.  
793 Incidence of testicular germ cell tumors among US men by census region. *Cancer*  
794 **121**: 4181-4189.
- 795 Giannoulatou E, Maher GJ, Ding Z, Gillis AJM, Dorssers LCJ, Hoischen A, Rajpert-De Meyts E,  
796 McVean G, Wilkie AOM, Looijenga LHJ et al. 2017. Whole-genome sequencing of  
797 spermatocytic tumors provides insights into the mutational processes operating in  
798 the male germline. *PLoS One* **12**: e0178169.
- 799 Giannoulatou E, McVean G, Taylor IB, McGowan SJ, Maher GJ, Iqbal Z, Pfeifer SP, Turner I,  
800 Burkitt Wright EM, Shorto J et al. 2013. Contributions of intrinsic mutation rate and  
801 selfish selection to levels of de novo HRAS mutations in the paternal germline. *Proc*  
802 *Natl Acad Sci USA* **110**: 20152-20157.
- 803 Glass J. 2005. Testes and epididymes. In *Gray's Anatomy: The anatomical basis of clinical*  
804 *practice (39th edition)*, (ed. S Standring), pp. 1304–1310. Churchill Livingstone,  
805 Edinburgh, UK.
- 806 Goldmann JM, Wong WS, Pinelli M, Farrah T, Bodian D, Stittrich AB, Glusman G, Vissers LE,  
807 Hoischen A, Roach JC et al. 2016. Parent-of-origin-specific signatures of de novo  
808 mutations. *Nat Genet* **48**: 935-939.
- 809 Goriely A, Hansen RM, Taylor IB, Olesen IA, Jacobsen GK, McGowan SJ, Pfeifer SP, McVean  
810 GA, Rajpert-De Meyts E, Wilkie AOM. 2009. Activating mutations in FGFR3 and HRAS  
811 reveal a shared genetic origin for congenital disorders and testicular tumors. *Nat*  
812 *Genet* **41**: 1247-1252.
- 813 Goriely A, McGrath JJ, Hultman CM, Wilkie AOM, Malaspina D. 2013. "Selfish  
814 spermatogonial selection": a novel mechanism for the association between  
815 advanced paternal age and neurodevelopmental disorders. *Am J Psychiatry* **170**: 599-  
816 608.
- 817 Goriely A, McVean GA, van Pelt AM, O'Rourke AW, Wall SA, de Rooij DG, Wilkie AOM. 2005.  
818 Gain-of-function amino acid substitutions drive positive selection of FGFR2  
819 mutations in human spermatogonia. *Proc Natl Acad Sci USA* **102**: 6051-6056.
- 820 Goriely A, McVean GAT, Rojmyr M, Ingemarsson B, Wilkie AOM. 2003. Evidence for selective  
821 advantage of pathogenic FGFR2 mutations in the male germ line. *Science* **301**: 643-  
822 646.
- 823 Goriely A, Wilkie AOM. 2012. Paternal age effect mutations and selfish spermatogonial  
824 selection: causes and consequences for human disease. *Am J Hum Genet* **90**: 175-  
825 200.
- 826 Hafner C, Toll A, Fernandez-Casado A, Earl J, Marques M, Acquadro F, Mendez-Pertuz M,  
827 Urioste M, Malats N, Burns JE et al. 2010. Multiple oncogenic mutations and clonal  
828 relationship in spatially distinct benign human epidermal tumors. *Proc Natl Acad Sci*  
829 *USA* **107**: 20780-20785.
- 830 Hestand MS, Van Houdt J, Cristofoli F, Vermeesch JR. 2016. Polymerase specific error rates  
831 and profiles identified by single molecule sequencing. *Mutat Res* **784-785**: 39-45.
- 832 Hiatt JB, Pritchard CC, Salipante SJ, O'Roak BJ, Shendure J. 2013. Single molecule molecular  
833 inversion probes for targeted, high-accuracy detection of low-frequency variation.  
834 *Genome Res* **23**: 843-854.

- 835 Holstege H, Pfeiffer W, Sie D, Hulsman M, Nicholas TJ, Lee CC, Ross T, Lin J, Miller MA, Ylstra  
836 B et al. 2014. Somatic mutations found in the healthy blood compartment of a 115-  
837 yr-old woman demonstrate oligoclonal hematopoiesis. *Genome Res* **24**: 733-742.
- 838 Jaiswal S, Fontanillas P, Flannick J, Manning A, Grauman PV, Mar BG, Lindsley RC, Mermel  
839 CH, Burt N, Chavez A et al. 2014. Age-related clonal hematopoiesis associated with  
840 adverse outcomes. *N Engl J Med* **371**: 2488-2498.
- 841 Jonsson H, Sulem P, Kehr B, Kristmundsdottir S, Zink F, Hjartarson E, Hardarson MT,  
842 Hjorleifsson KE, Eggertsson HP, Gudjonsson SA et al. 2017. Parental influence on  
843 human germline de novo mutations in 1,548 trios from Iceland. *Nature* **549**: 519-  
844 522.
- 845 Kennedy SR, Schmitt MW, Fox EJ, Kohn BF, Salk JJ, Ahn EH, Prindle MJ, Kuong KJ, Shen JC,  
846 Risques RA et al. 2014. Detecting ultralow-frequency mutations by Duplex  
847 Sequencing. *Nat Protoc* **9**: 2586-2606.
- 848 Klein AM, Brash DE, Jones PH, Simons BD. 2010a. Stochastic fate of p53-mutant epidermal  
849 progenitor cells is tilted toward proliferation by UV B during preneoplasia. *Proc Natl  
850 Acad Sci U S A* **107**: 270-275.
- 851 Klein AM, Nakagawa T, Ichikawa R, Yoshida S, Simons BD. 2010b. Mouse germ line stem cells  
852 undergo rapid and stochastic turnover. *Cell Stem Cell* **7**: 214-224.
- 853 Kobayashi T, Aoki Y, Niihori T, Cave H, Verloes A, Okamoto N, Kawame H, Fujiwara I, Takada  
854 F, Ohata T et al. 2010. Molecular and clinical analysis of RAF1 in Noonan syndrome  
855 and related disorders: dephosphorylation of serine 259 as the essential mechanism  
856 for mutant activation. *Hum Mutat* **31**: 284-294.
- 857 Koczkowska M, Chen Y, Callens T, Gomes A, Sharp A, Johnson S, Hsiao MC, Chen Z,  
858 Balasubramanian M, Barnett CP et al. 2018. Genotype-Phenotype Correlation in NF1:  
859 Evidence for a More Severe Phenotype Associated with Missense Mutations  
860 Affecting NF1 Codons 844-848. *Am J Hum Genet* **102**: 69-87.
- 861 Kong A, Frigge ML, Masson G, Besenbacher S, Sulem P, Magnusson G, Gudjonsson SA,  
862 Sigurdsson A, Jonasdottir A, Wong WS et al. 2012. Rate of de novo mutations and the  
863 importance of father's age to disease risk. *Nature* **488**: 471-475.
- 864 Krupp DR, Barnard RA, Duffourd Y, Evans SA, Mulqueen RM, Bernier R, Riviere JB, Fombonne  
865 E, O'Roak BJ. 2017. Exonic Mosaic Mutations Contribute Risk for Autism Spectrum  
866 Disorder. *Am J Hum Genet* **101**: 369-390.
- 867 Laurie CC, Laurie CA, Rice K, Doheny KF, Zelnick LR, McHugh CP, Ling H, Hetrick KN, Pugh  
868 EW, Amos C et al. 2012. Detectable clonal mosaicism from birth to old age and its  
869 relationship to cancer. *Nat Genet* **44**: 642-650.
- 870 Li H. 2014. Toward better understanding of artifacts in variant calling from high-coverage  
871 samples. *Bioinformatics* **30**: 2843-2851.
- 872 Lim J, Maher GJ, Turner GD, Dudka-Ruszkowska W, Taylor S, Rajpert-De Meyts E, Goriely A,  
873 Wilkie AO. 2012. Selfish spermatogonial selection: evidence from an  
874 immunohistochemical screen in testes of elderly men. *PLoS One* **7**: e42382.
- 875 Maher GJ, Goriely A, Wilkie AOM. 2014. Cellular evidence for selfish spermatogonial  
876 selection in aged human testes. *Andrology* **2**: 304-314.
- 877 Maher GJ, McGowan SJ, Giannoulidou E, Verrill C, Goriely A, Wilkie AO. 2016a. Visualizing  
878 the origins of selfish de novo mutations in individual seminiferous tubules of human  
879 testes. *Proc Natl Acad Sci U S A* **113**: 2454-2459.
- 880 Maher GJ, Rajpert-De Meyts E, Goriely A, Wilkie AO. 2016b. Cellular correlates of selfish  
881 spermatogonial selection. *Andrology* **4**: 550-553.

- 882 Martincorena I, Raine KM, Gerstung M, Dawson KJ, Haase K, Van Loo P, Davies H, Stratton  
883 MR, Campbell PJ. 2017. Universal Patterns of Selection in Cancer and Somatic  
884 Tissues. *Cell* **171**: 1029-1041 e1021.
- 885 Martincorena I, Roshan A, Gerstung M, Ellis P, Van Loo P, McLaren S, Wedge DC, Fullam A,  
886 Alexandrov LB, Tubio JM et al. 2015. Tumor evolution. High burden and pervasive  
887 positive selection of somatic mutations in normal human skin. *Science* **348**: 880-886.
- 888 McKerrell T, Park N, Moreno T, Grove CS, Ponstingl H, Stephens J, Crawley C, Craig J, Scott  
889 MA, Hodgkinson C et al. 2015. Leukemia-associated somatic mutations drive distinct  
890 patterns of age-related clonal hemopoiesis. *Cell Rep* **10**: 1239-1245.
- 891 Minoche AE, Dohm JC, Himmelbauer H. 2011. Evaluation of genomic high-throughput  
892 sequencing data generated on Illumina HiSeq and genome analyzer systems.  
893 *Genome Biol* **12**: R112.
- 894 Neel BG, Gu H, Pao L. 2003. The 'Shp'ing news: SH2 domain-containing tyrosine  
895 phosphatases in cell signaling. *Trends Biochem Sci* **28**: 284-293.
- 896 Nikolaev SI, Vetiska S, Bonilla X, Boudreau E, Jauhiainen S, Rezai Jahromi B, Khyzha N,  
897 DiStefano PV, Suutarinen S, Kiehl TR et al. 2018. Somatic Activating KRAS Mutations  
898 in Arteriovenous Malformations of the Brain. *N Engl J Med* **378**: 250-261.
- 899 Paniagua R, Martin A, Nistal M, Amat P. 1987. Testicular involution in elderly men:  
900 comparison of histologic quantitative studies with hormone patterns. *Fertil Steril* **47**:  
901 671-679.
- 902 Potapov V, Ong JL. 2017. Examining Sources of Error in PCR by Single-Molecule Sequencing.  
903 *PLoS One* **12**: e0169774.
- 904 Qin J, Calabrese P, Tiemann-Boege I, Shinde DN, Yoon SR, Gelfand D, Bauer K, Arnheim N.  
905 2007. The molecular anatomy of spontaneous germline mutations in human testes.  
906 *PLoS Biol* **5**: e224.
- 907 Rahbari R, Wuster A, Lindsay SJ, Hardwick RJ, Alexandrov LB, Turki SA, Dominiczak A, Morris  
908 A, Porteous D, Smith B et al. 2016. Timing, rates and spectra of human germline  
909 mutation. *Nat Genet* **48**: 126-133.
- 910 Redig AJ, Capelletti M, Dahlberg SE, Sholl LM, Mach S, Fontes C, Shi Y, Chalasani P, Janne PA.  
911 2016. Clinical and Molecular Characteristics of NF1-Mutant Lung Cancer. *Clin Cancer*  
912 *Res* **22**: 3148-3156.
- 913 Robinson JT, Thorvaldsdottir H, Winckler W, Guttman M, Lander ES, Getz G, Mesirov JP.  
914 2011. Integrative genomics viewer. *Nat Biotechnol* **29**: 24-26.
- 915 Salk JJ, Schmitt MW, Loeb LA. 2018. Enhancing the accuracy of next-generation sequencing  
916 for detecting rare and subclonal mutations. *Nat Rev Genet* **19**: 269-285.
- 917 Shinde DN, Elmer DP, Calabrese P, Boulanger J, Arnheim N, Tiemann-Boege I. 2013. New  
918 evidence for positive selection helps explain the paternal age effect observed in  
919 achondroplasia. *Hum Mol Genet* **22**: 4117-4126.
- 920 Simons BD. 2016. Deep sequencing as a probe of normal stem cell fate and preneoplasia in  
921 human epidermis. *Proc Natl Acad Sci U S A* **113**: 128-133.
- 922 Swanton C. 2015. Cancer evolution constrained by mutation order. *N Engl J Med* **372**: 661-  
923 663.
- 924 Tiemann-Boege I, Navidi W, Grewal R, Cohn D, Eskenazi B, Wyrobek AJ, Arnheim N. 2002.  
925 The observed human sperm mutation frequency cannot explain the achondroplasia  
926 paternal age effect. *Proc Natl Acad Sci U S A* **99**: 14952-14957.

- 927 Van Allen EM, Wagle N, Sucker A, Treacy DJ, Johannessen CM, Goetz EM, Place CS, Taylor-  
928 Weiner A, Whittaker S, Kryukov GV et al. 2014. The genetic landscape of clinical  
929 resistance to RAF inhibition in metastatic melanoma. *Cancer Discov* **4**: 94-109.
- 930 Vermeulen L, Morrissey E, van der Heijden M, Nicholson AM, Sottoriva A, Buczacki S, Kemp  
931 R, Tavaré S, Winton DJ. 2013. Defining stem cell dynamics in models of intestinal  
932 tumor initiation. *Science* **342**: 995-998.
- 933 Wan PT, Garnett MJ, Roe SM, Lee S, Niculescu-Duvaz D, Good VM, Jones CM, Marshall CJ,  
934 Springer CJ, Barford D et al. 2004. Mechanism of activation of the RAF-ERK signaling  
935 pathway by oncogenic mutations of B-RAF. *Cell* **116**: 855-867.
- 936 Wang H, Qian Y, Wu B, Zhang P, Zhou W. 2015. KRAS G12D mosaic mutation in a Chinese  
937 linear nevus sebaceous syndrome infant. *BMC Med Genet* **16**: 101.
- 938 Wang K, Li M, Hakonarson H. 2010. ANNOVAR: Functional annotation of genetic variants  
939 from next-generation sequencing data. *Nucleic Acids Res* **38**.
- 940 Wilkie AO. 2005. Bad bones, absent smell, selfish testes: the pleiotropic consequences of  
941 human FGF receptor mutations. *Cytokine Growth Factor Rev* **16**: 187-203.
- 942 Yoon SR, Choi SK, Eboeime J, Gelb BD, Calabrese P, Arnheim N. 2013. Age-Dependent  
943 Germline Mosaicism of the Most Common Noonan Syndrome Mutation Shows the  
944 Signature of Germline Selection. *Am J Hum Genet* **92**: 917-926.
- 945 Yoon SR, Qin J, Glaser RL, Jabs EW, Wexler NS, Sokol R, Arnheim N, Calabrese P. 2009. The  
946 ups and downs of mutation frequencies during aging can account for the Apert  
947 syndrome paternal age effect. *PLoS Genet* **5**: e1000558.
- 948 Zink F, Stacey SN, Norddahl GL, Frigge ML, Magnusson OT, Jonsdottir I, Thorgeirsson TE,  
949 Sigurdsson A, Gudjonsson SA, Gudmundsson J et al. 2017. Clonal hematopoiesis,  
950 with and without candidate driver mutations, is common in the elderly. *Blood* **130**:  
951 742-752.
- 952
